# Supplementary material
Source: PubMed Central journal article supplement (PMC3245796)
Supplement: NIHMS333128-supplement-2.pdf [file NIHMS333128-supplement-2.pdf]

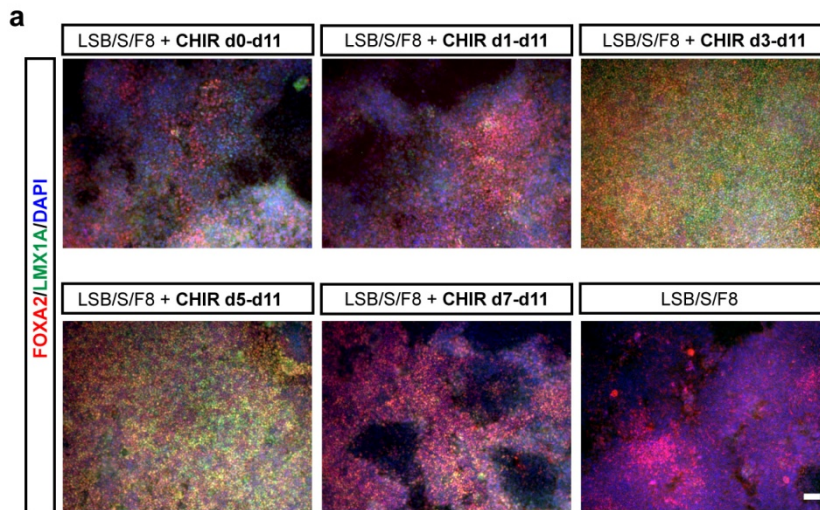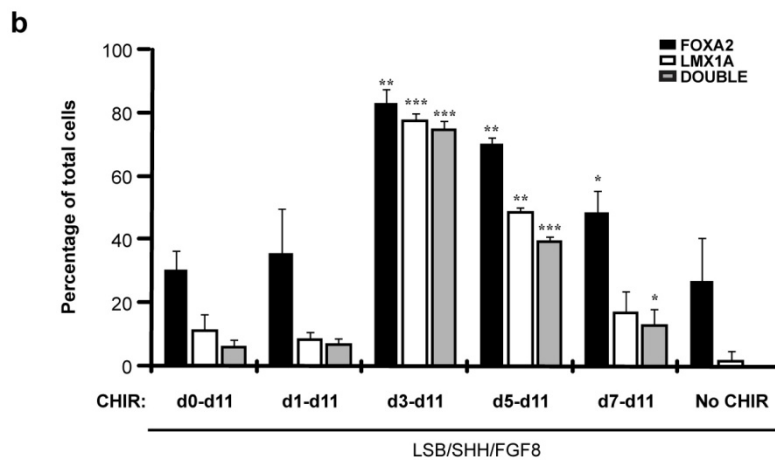

**Supplementary Figure 1: Timing of CHIR99021 exposure determines induction of FOXA2/LMX1A midbrain floor plate precursors.** **a)** Immunocytochemical analysis of FOXA2(red)/LMX1A(green) at day 11 of differentiation following LSB/S/F8 treatment alone or in combination with CHIR starting at the various time points indicated. **b)** Quantification of the percentage of FOXA2+, LMX1A+ and double labeled cells at day 11 of differentiation following differential onset of CHIR exposure as described in (a). Significance levels for individual markers are presented as compared to no CHIR condition: ANOVA; Dunnett test: \*\*\*  $p < 0.001$ ; \*\*  $p < 0.01$ ; \*  $p < 0.05$ ). Scale bars correspond to 50  $\mu\text{m}$ .

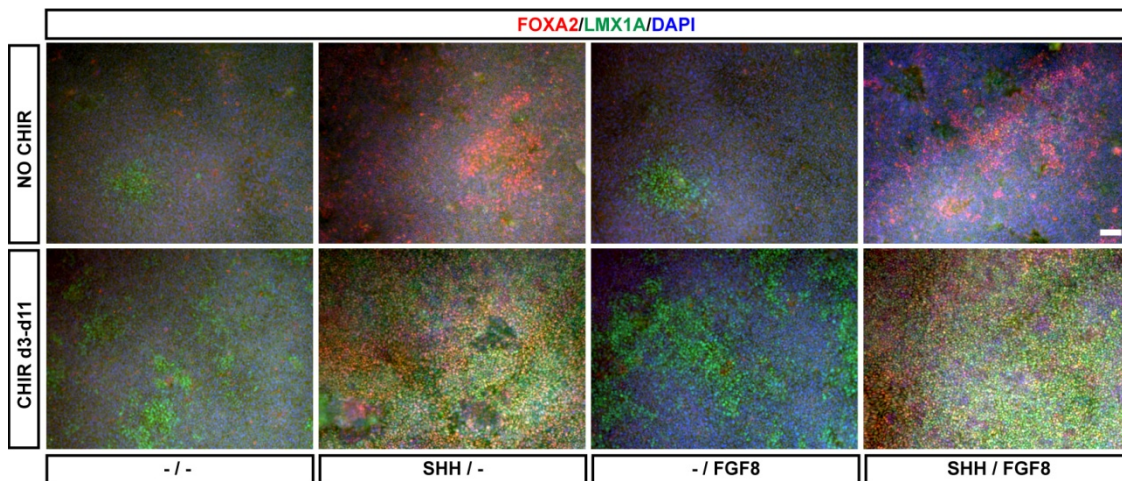

**Supplementary Figure 2: FGF8 exposure does not play a major role in the induction of FOXA2/LMX1A midbrain floor plate precursors.** Representative images of FOXA2(red)/LMX1A(green) expression by immunocytochemistry at day 11 of differentiation. Cells were exposed to LSB/ CHIR in the presence or absence of SHH (purmorphamine + SHH C25II) and FGF8. Scale bars correspond to 50  $\mu$ m.

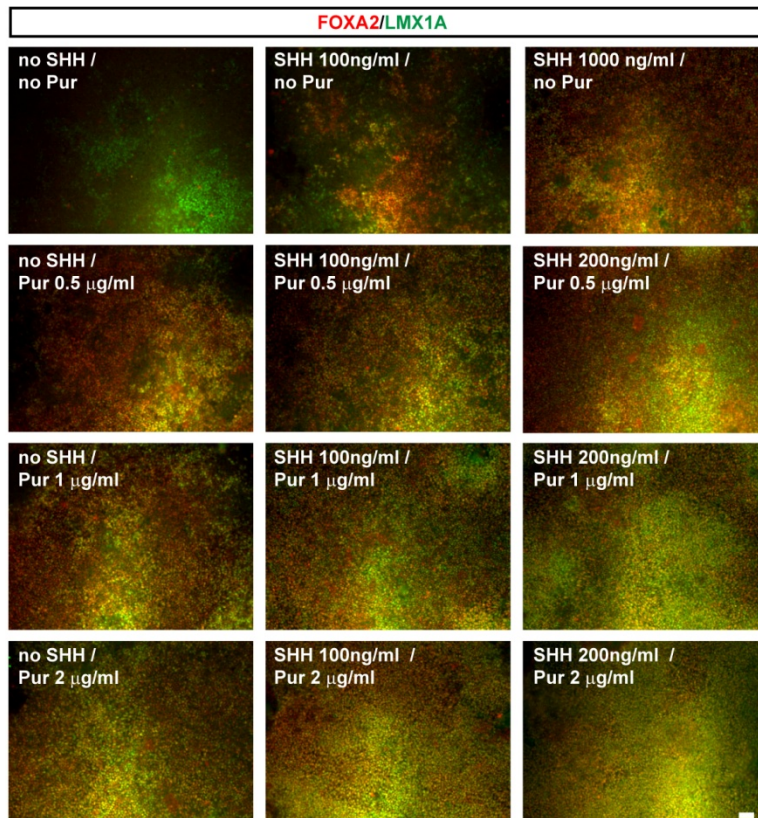

**Supplementary Figure 3: Exposure to high dose of SHH and/or a smoothed small molecule agonist (purmorphamine) is required for efficient midbrain floor plate induction in the presence of CHIR99021.** Representative images of FOXA2(red)/LMX1A(green) immunocytochemistry at day 11 of differentiation. Cells were treated with LSB/F8/CHIR in the presence of various concentrations of SHH (SHH-C25II) and smoothed agonist purmorphamine. Scale bars correspond to 50 µm.

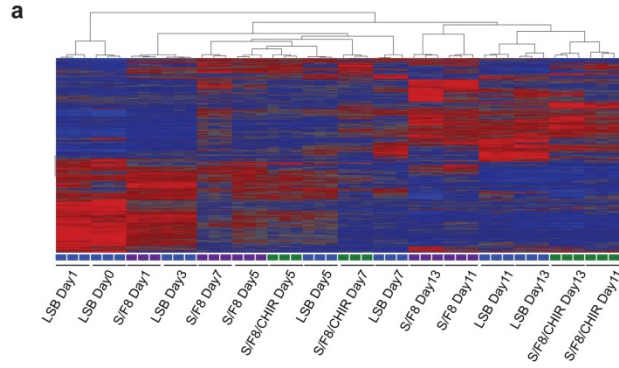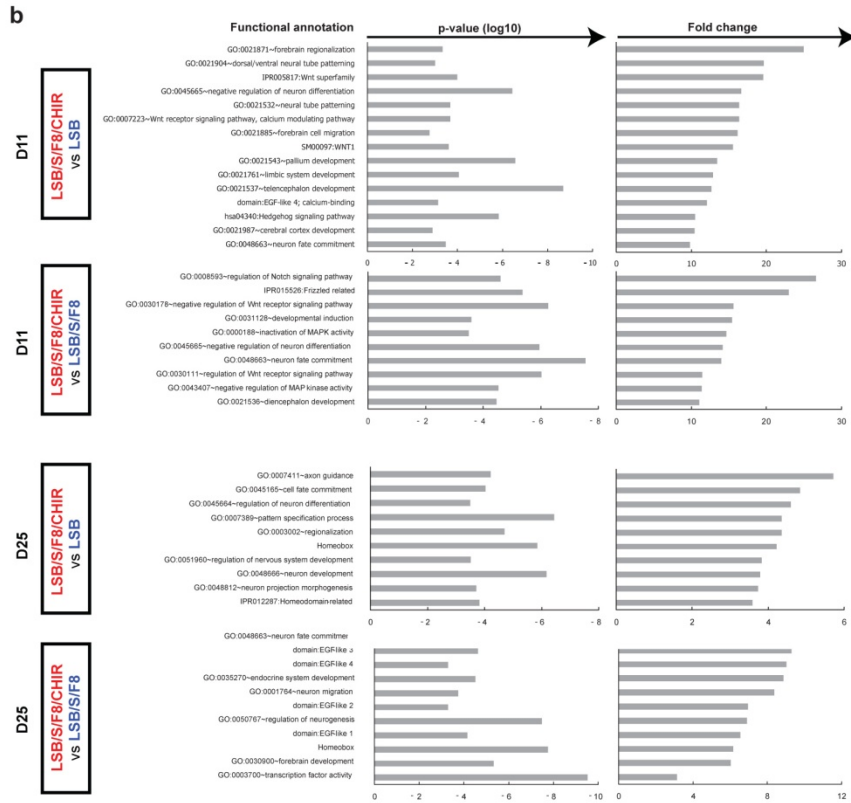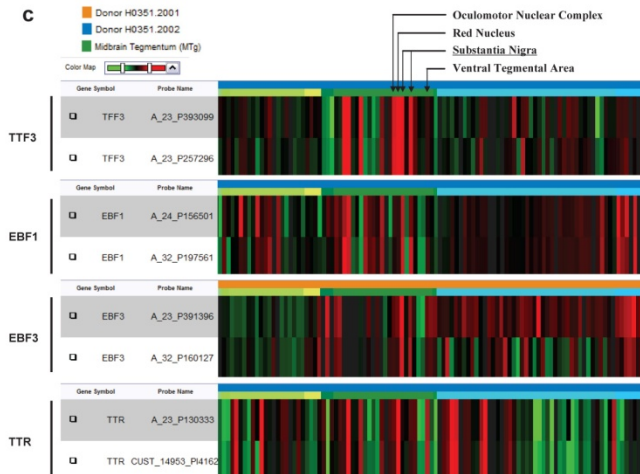

**Supplementary Figure 4: Analysis of genes differentially expressed in LSB/S/F8/CHIR treated versus LSB and LSB/S/F8 treated cultures at days 11 and 25 of differentiation.**

a) Hierarchical clustering of the global gene expression data obtained from all three conditions at days 0, 1, 3, 5, 7, 11 and 13 (samples were assessed in triplicates for each condition and each day). b) Gene enrichment analysis according to GO classes using DAVID; <http://david.abcc.ncifcrf.gov><sup>18</sup>. Comparisons at day 11 reveal enrichment for both SHH and WNT signaling in LSB/S/F8/CHIR condition in agreement with CHIR99021 mediated activation of canonical WNT signaling. Alternative cell fates such as “forebrain development” and “diencephalon” as well as “homeobox” are other GO terms highly enriched at days 11 and 25. c) Online validation using the Allen gene human expression data base (<http://human.brain-map.org>) for candidate markers enriched in midbrain DA neuron condition (LSB/S/F8/CHIR). TTF3, EBF1, EBF3 and TTR are expressed based on available human brain region specific microarray data. TTR, a classic transcriptional target of FOXA2 is only weakly expressed in adult substantia nigra, suggesting that its main role may be during development or that SHH treatment may cause artificially high TTR expression levels during *in vitro* differentiation.

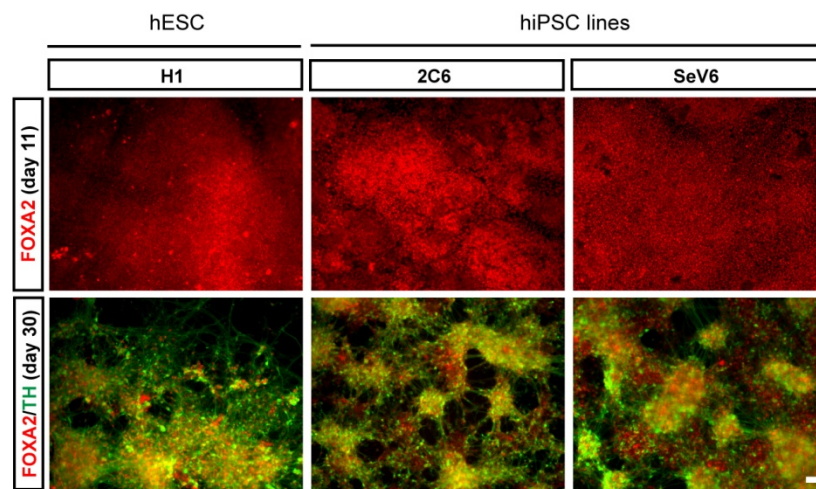

**Supplementary Figure 5: Validation of floor plate induction and midbrain DA neuron differentiation protocol in representative independent hESC and hiPSC lines.**

Data from the hESC line H1 and the hiPSC lines 2C6<sup>27</sup> (from a sporadic PD patient) and SeV6 (Sendai-based, integration-free) are presented. The FP based protocol described in **Figure 1d** and **Supplementary Figure 6**, was used followed by analysis of FOXA2 (red) expression at day 11 and TH(green)/FOXA2(red) at day 25 of differentiation.

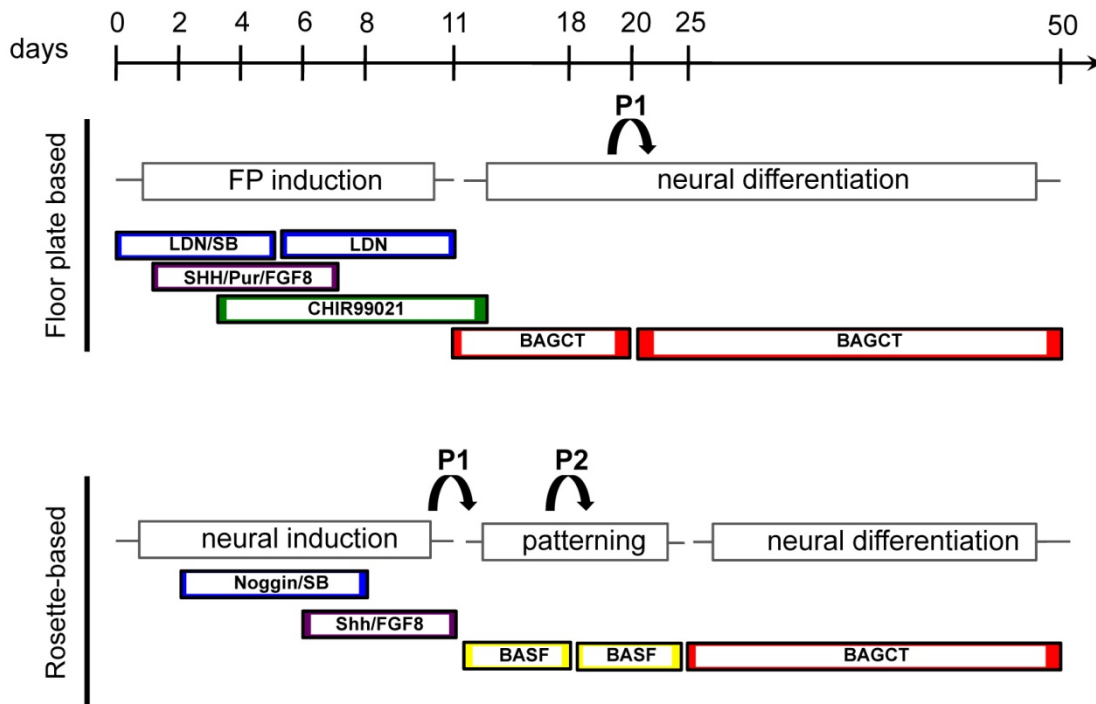

**Supplementary Figure 6: Schematic summary of the differentiation conditions used for floor plate-derived and rosette-derived DA neuron cultures.**

Both protocols used dual-SMAD inhibition<sup>13</sup> to accelerate neural fate acquisition. LDN was used for BMP inhibition in the FP protocol while the traditional noggin induction was used for rosette cultures. The abbreviations are: LDN: LDN193189, SB: SB431542, SHH (purmorphamine + SHH C25II), BAGCT<sup>2</sup>: BDNF + ascorbic acid + GDNF + dbcAMP + TGFβ3. SHH/FGF8 in the rosette protocol used SHH C25I alone in the absence of Purmorphamine following the initial recommendation for patterning of rosette-derived DA neuron cultures. Note: Purmorphamine treatment at rosette stage shows toxicity at concentration suitable for patterning FP cells. BASF: BDNF + ascorbic acid + SHH/FGF8.

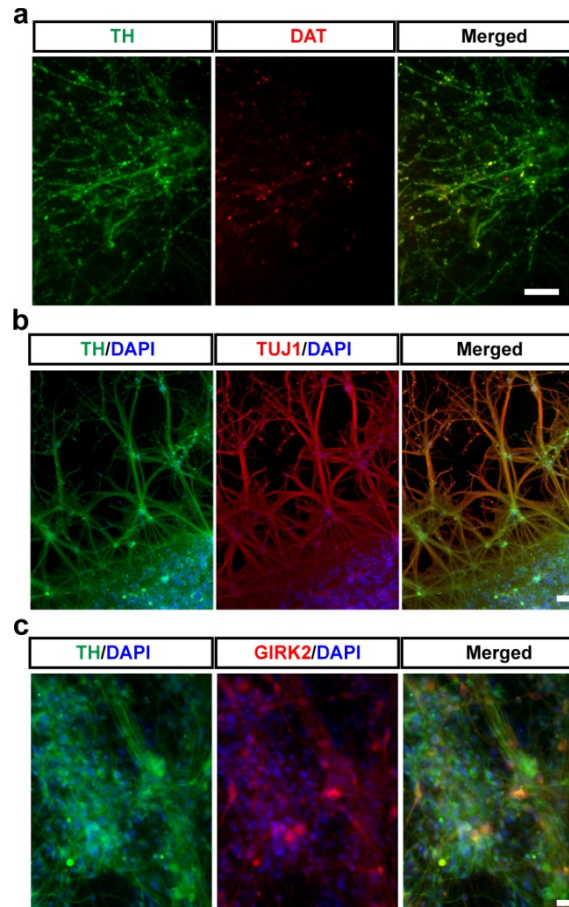

**Supplementary Figure 7: *In vitro* maturation of floor plate-derived DA neuron cultures.**

**a)** Immunocytochemical analysis of FP-derived TH neurons (green) for DAT expression (red; day 80). **b)** Extensive Tuj1+ (red) fiber tracts were observed by day 60 of differentiation extending over distances of > 2 mm. **c)** At day 80 of differentiation, co-expression of GIRK2 (red) in TH+ neurons (green). Scale bars correspond to 20  $\mu$ m in (a) 100  $\mu$ m in (b) and 20  $\mu$ m in (c)



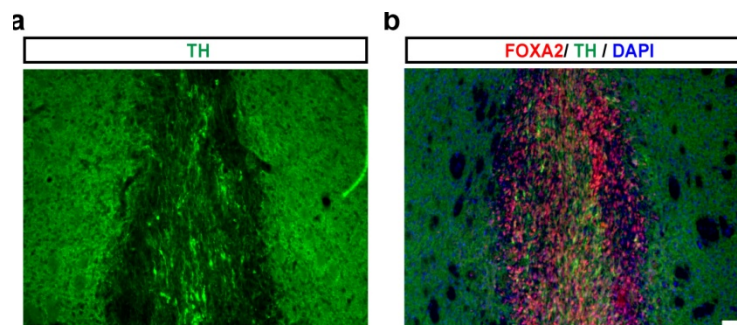

**Supplementary Figure 8: Immunohistochemical analysis of short-term (6 weeks) *in vivo* survival studies in adult intact (unlesioned) mouse striatum (*NOD-SCID IL2Rgc* null strain).**

**a,b)** Analysis of FP derived grafts (day 25 cells;  $150 \times 10^3$  cells/animal). **a)** Representative image of graft core showing TH+ cells surrounded by TH+ host fibers. An average of 6,200 TH+ cells (n=3) were present in the graft at 6 weeks after transplantation. **b)** FOXA2 expressing cells (red) were only found in the graft but not in the surrounding host striatum demonstrating graft origin and midbrain identity of the cells. Nearly all TH+ neurons (green) co-expressed FOXA2 (red). However, a considerable proportion of FOXA2+ cells did not co-express TH suggesting that these cells have not yet acquired a mature DA phenotype or represent another FOXA2+ neuronal population negative for DA neuron markers. Scale bars correspond to 50  $\mu\text{m}$ .

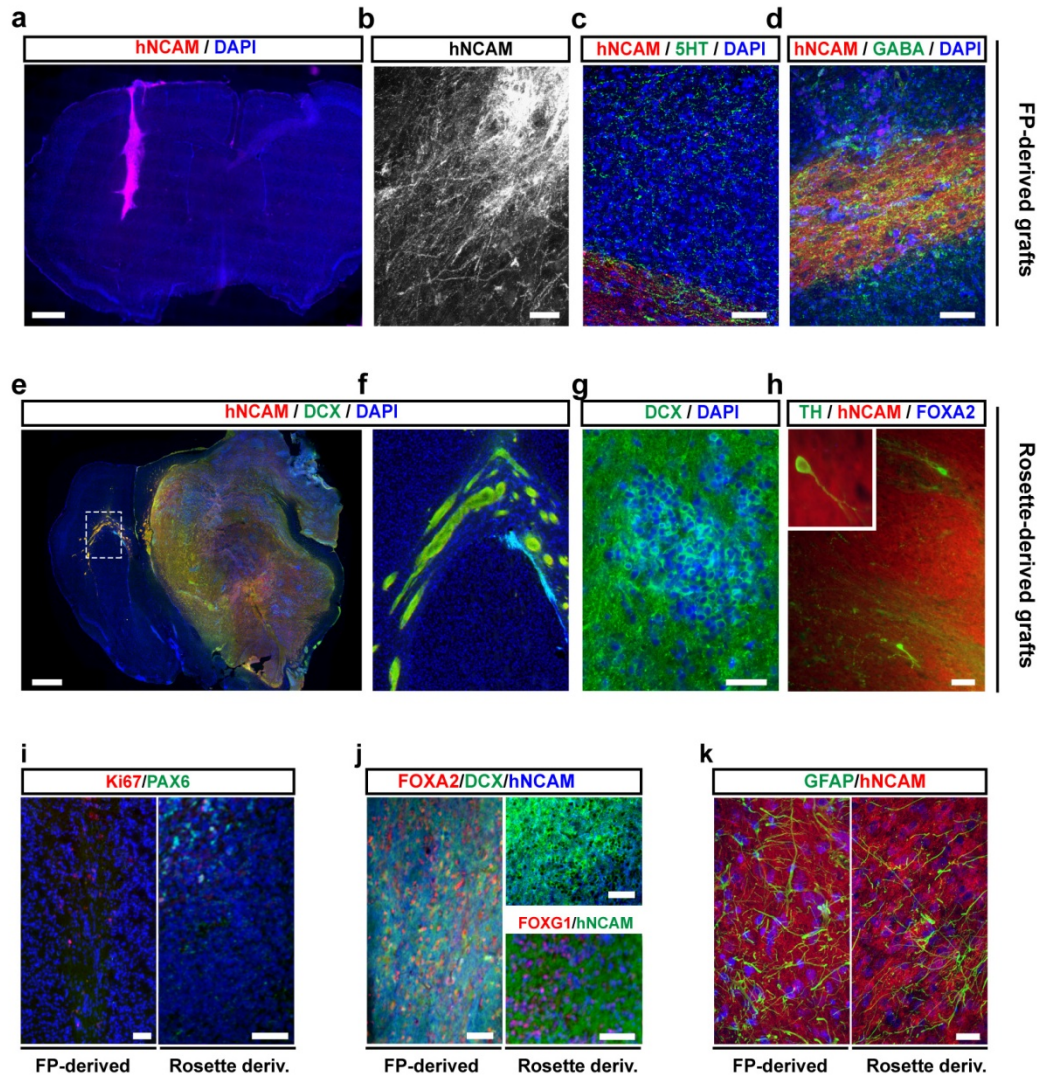

**Supplementary Figure 9: Histological analysis of long-term (4.5 months) grafted 6-OHDA lesioned mice (*NOD-SCID IL2Rgc* null strain) comparing behavior of floor plate- versus rosette-derived grafts. **a-d)** Analysis of FP-derived grafts. **a)** Example of one of the largest FP-derived grafts. The graft retains a well circumscribed hNCAM+ (red) cytoarchitecture. **b)** Robust hNCAM+ fiber outgrowth was observed at graft periphery. **c)** Serotonergic (5-HT+) fibers (green) in graft are largely negative for hNCAM (red) suggesting host origin. **d)** GABAergic neurons and fibers (green) in graft. **e-h)** Analysis of rosette-derived grafts: **e)** Neural overgrowth with compression of host brain tissue. The majority of cells were positive for both NCAM (red) and DCX (green) suggesting neuronal fate. **f)** NCAM+/DCX+ fibers extended to the non-transplanted contra-lateral side of the brain. **g)** Within the graft core we observed multiple DCX+ clusters. **h)** Only very few TH+ cells (green) and fibers were observed at graft periphery and**

nearly all rosette-derived TH<sup>+</sup> cells *in vivo* were negative for FOXA2 (blue). **i-k**) Immunohistochemical analysis of FP-derived versus rosette-derived grafts at 4.5 months. Representative images are presented for expression of the proliferation marker Ki67 (red) and the neural precursor marker PAX6 (green) (**i**), expression of FOXA2/DCX (**j**), FOXP1/hNCAM (**j**, inset), and the astrocytes marker GFAP (green) (**k**). Scale bars correspond to 500  $\mu\text{m}$  in (**a**), 50  $\mu\text{m}$  in (**b-d**), to 500  $\mu\text{m}$  in (**e**), 50  $\mu\text{m}$  in (**g-h**), 50  $\mu\text{m}$  in (**i**), 40  $\mu\text{m}$  in (**j**) and 20  $\mu\text{m}$  in (**k**).

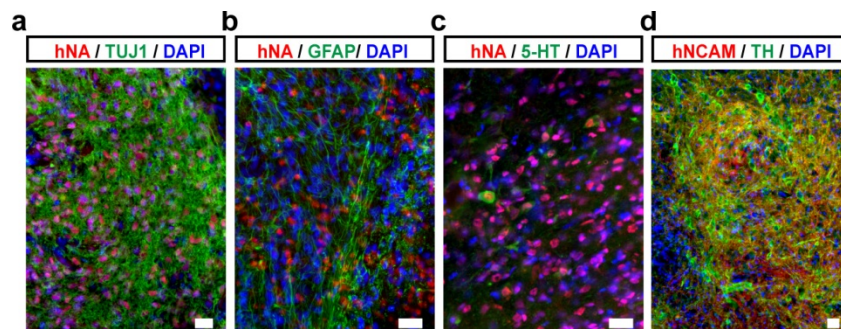

**Supplementary Figure 10: Histological analysis of long-term (5 months) grafted 6-OHDA lesioned SD rats.** **a)** The large majority of hNA<sup>+</sup> (red) cells expressed Tuj1 (green) indicating neuronal fate identity. **b)** GFAP<sup>+</sup> fibers (green) within the graft did not co-express hNA (red) suggesting host origin. **c)** A few human serotonergic (5-HT<sup>+</sup>) cell bodies (green) were observed while most serotonergic fibers were host-derived similar to the data in mouse host (**Supplementary Figure 9C**). **d)** Additional example of TH<sup>+</sup> neurons (green) within graft characterized for expression of hNCAM (red) to confirm human identity of cells in host brain. Scale bars correspond to 25  $\mu$ m in all panels.

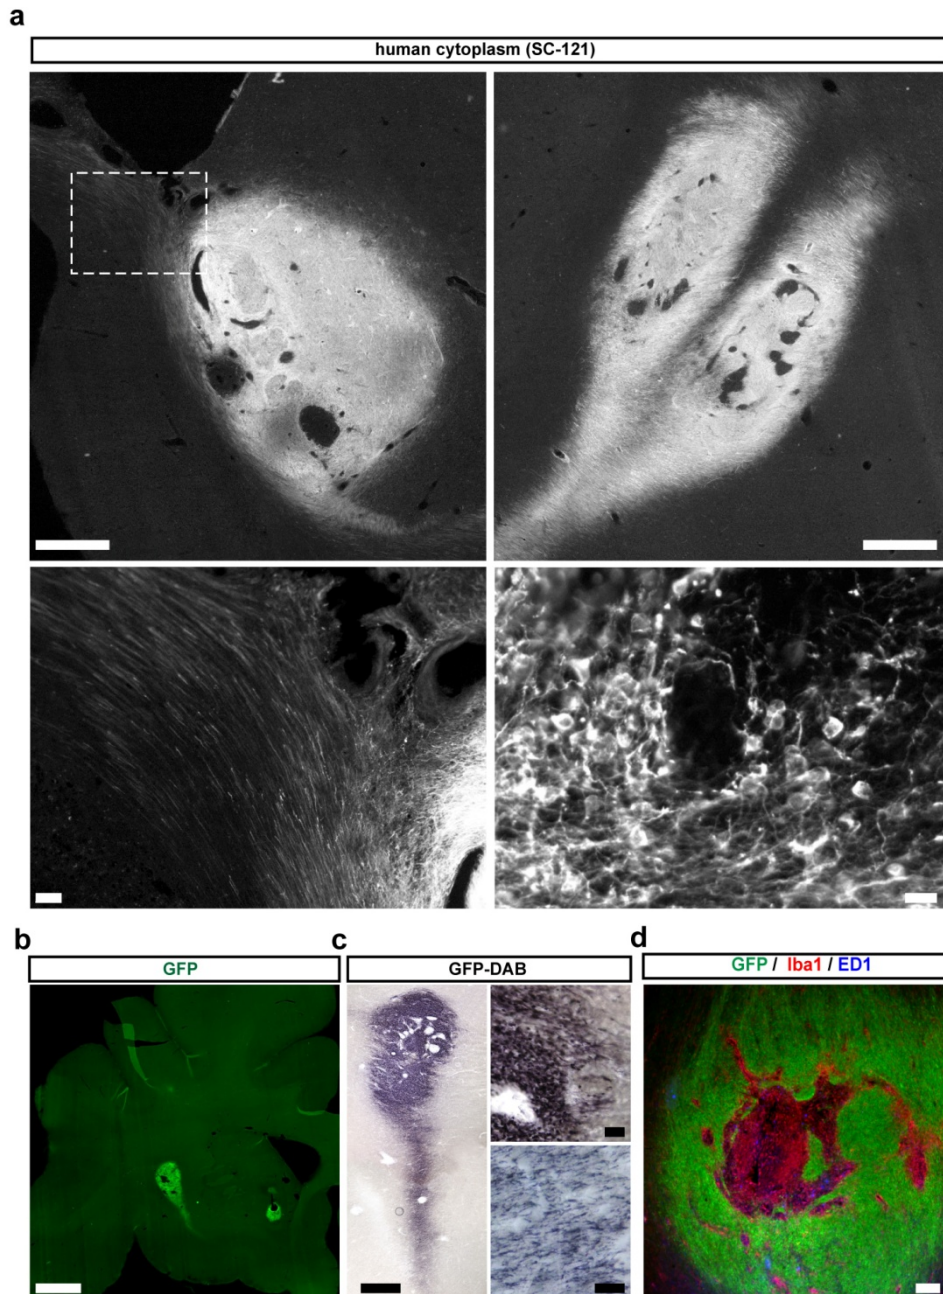

**Supplementary Figure 11: Histological analysis of floor plate-derived grafts in primate brain.** FP-derived DA neurons derived from H9 hESCs and from H9-GFP hESCs (day 25 cultures;  $1.25 \times 10^6$  cells/tract, 3 tracts/per hemisphere, 6 tracts in total) were grafted into the striatum of adult MPTP lesioned rhesus monkeys (=2). **a** Upper left and right panels: High resolution image reconstructions of representative graft sites (1 month after transplantation). Graft cytoarchitecture is illustrated by immunohistochemistry for the human specific marker SC-121 (no cross-reactivity with non-human primate tissues). Lower left panel: SC-121+ fibers extending

from graft core. Lower right panel: Higher resolution image of SC-121+ cells showing neuronal precursor morphologies. **b**) Analysis of GFP expression in graft cores further confirmed human identity of the cells complementing the SC-121 data. Note: For both animals, one hemisphere each was grafted with unmarked H9 derived cells while the other hemisphere received cells derived from H9-GFP cells (expression of GFP under control of EF1a promoter<sup>38</sup>). **c**) Higher resolution image of the GFP+ graft using DAB detection showing numerous GFP+ cells at graft periphery exhibiting neuroblast morphology. **d**) Immunohistochemical analyses of areas in the graft core negative for GFP and SC-121. These areas contained large numbers of host microglia based on Iba1 expression (red) as well as few ED1+ macrophages (blue), suggesting persistent inflammation despite cyclosporine immunosuppression. Scale bars correspond to 500  $\mu\text{m}$  in (**a**, top panel), 50  $\mu\text{m}$  in (**a**, lower left panel), 20  $\mu\text{m}$  in (**a**, lower right panel), 2mm in (**b**), 500  $\mu\text{m}$  in (**c**, left panel), 50  $\mu\text{m}$  (**c**, upper right panel), 100  $\mu\text{m}$  (**c**, lower right panel), 100  $\mu\text{m}$  (**d**).

## **Supplementary Table 1**

| Column # | Column ID | Fold-Change | p-value  |
|----------|-----------|-------------|----------|
| 7304     | FOXA1     | 22.5512     | 5.03E-16 |
| 7305     | FOXA2     | 17.3328     | 5.70E-17 |
| 31270    | SPON1     | 16.4393     | 2.14E-14 |
| 31684    | SYT4      | 13.2693     | 9.61E-12 |
| 4334     | COL22A1   | 8.54042     | 2.05E-17 |
| 6616     | FBLN1     | 8.24162     | 4.97E-18 |
| 32035    | TFF3      | 8.01805     | 1.08E-13 |
| 5324     | DKK1      | 7.95664     | 1.19E-09 |
| 3244     | CAPN6     | 7.58928     | 1.77E-08 |
| 2544     | C20ORF56  | 7.58575     | 6.71E-15 |
| 27591    | PKDCC     | 7.42271     | 2.02E-11 |
| 23584    | LOC91461  | 5.43556     | 9.86E-09 |
| 5037     | DDC       | 5.19301     | 2.09E-08 |
| 13598    | LDB2      | 4.76303     | 2.92E-09 |
| 723      | AMOT      | 4.58838     | 5.68E-08 |
| 4978     | DBX1      | 4.40946     | 2.36E-09 |
| 31138    | SOX8      | 4.32227     | 9.29E-08 |
| 30193    | SILV      | 4.3198      | 2.52E-07 |
| 30148    | SHISA2    | 4.31109     | 1.60E-07 |
| 31509    | STK39     | 3.65624     | 2.90E-06 |
| 27661    | PLCL2     | 3.63607     | 6.81E-11 |
| 24425    | MGST1     | 3.59223     | 2.48E-11 |
| 32945    | TSPAN7    | 3.57361     | 7.36E-07 |
| 29082    | RHOU      | 3.51768     | 5.89E-06 |
| 9283     | HS.19193  | 3.49663     | 6.24E-13 |
| 5478     | DOCK10    | 3.43476     | 8.18E-07 |
| 25094    | MMP11     | 3.40705     | 2.13E-08 |
| 29975    | SERPINF1  | 3.36169     | 1.97E-10 |
| 29042    | RGS4      | 3.33544     | 7.01E-06 |
| 926      | APCDD1    | 3.33059     | 3.47E-10 |
| 12640    | IRX3      | 3.32454     | 1.65E-05 |
| 26837    | OSBPL10   | 3.3051      | 9.55E-07 |
| 32086    | THBS4     | 3.29135     | 9.77E-07 |

|       |              |         |          |
|-------|--------------|---------|----------|
| 14581 | LOC100130506 | 3.1293  | 5.81E-09 |
| 4931  | DAB2         | 3.02851 | 4.80E-09 |
| 12642 | IRX5         | 2.95938 | 2.73E-08 |
| 13774 | LMX1A        | 2.81057 | 1.42E-06 |
| 31516 | STOM         | 2.76317 | 2.01E-07 |
| 26374 | ODZ4         | 2.75644 | 3.06E-06 |
| 8210  | GSC          | 2.75053 | 3.47E-07 |
| 26170 | NRCAM        | 2.71264 | 1.82E-08 |
| 28414 | PTCH1        | 2.63379 | 2.99E-08 |
| 31578 | SULF2        | 2.59351 | 1.42E-07 |
| 7366  | FREM1        | 2.5697  | 2.25E-07 |
| 13743 | LITAF        | 2.55681 | 3.65E-08 |
| 26236 | NTNG1        | 2.55383 | 1.78E-07 |
| 25869 | NEUROG2      | 2.55012 | 5.05E-06 |
| 26132 | NPY          | 2.54575 | 4.48E-06 |
| 25967 | NKX2-1       | 2.52195 | 0.00023  |
| 27101 | PCDH18       | 2.46481 | 1.69E-05 |
| 32557 | TNFRSF19     | 2.45297 | 4.06E-08 |
| 5759  | EFEMP1       | 2.44308 | 7.78E-09 |
| 31148 | SP5          | 2.43459 | 5.34E-06 |
| 28069 | PQLC3        | 2.42685 | 2.59E-05 |
| 30313 | SLC20A2      | 2.40457 | 1.24E-06 |
| 30743 | SNHG4        | 2.35277 | 8.69E-08 |
| 27607 | PKP2         | 2.34734 | 5.34E-05 |
| 25520 | MYL4         | 2.3327  | 3.93E-08 |
| 26128 | NPTX2        | 2.29568 | 1.08E-05 |
| 26006 | NMD3         | 2.29039 | 3.18E-05 |
| 16924 | LOC391019    | 2.28656 | 1.25E-05 |
| 19975 | LOC646966    | 2.26444 | 6.23E-05 |
| 29894 | SEMA6A       | 2.25036 | 0.000844 |
| 6161  | EYA2         | 2.23175 | 0.00024  |
| 26105 | NPFRR2       | 2.23095 | 7.31E-05 |
| 4818  | CXXC4        | 2.23047 | 1.66E-05 |
| 2764  | C4ORF14      | 2.22128 | 5.73E-06 |
| 18269 | LOC642989    | 2.22053 | 0.000735 |
| 13059 | KIAA1324L    | 2.21906 | 4.75E-05 |



|       |              |         |          |
|-------|--------------|---------|----------|
| 23663 | LRIG3        | 2.21159 | 4.38E-07 |
| 6196  | FABP5L2      | 2.19875 | 3.09E-05 |
| 29347 | RPL13A       | 2.19362 | 0.000122 |
| 12446 | IL1RAPL1     | 2.19134 | 1.75E-05 |
| 28455 | PTN          | 2.18577 | 9.36E-05 |
| 30746 | SNHG7        | 2.18224 | 4.35E-07 |
| 28788 | RASL12       | 2.16856 | 1.39E-05 |
| 17150 | LOC401074    | 2.16782 | 1.07E-06 |
| 30283 | SLC16A3      | 2.16541 | 6.06E-05 |
| 15378 | LOC100133008 | 2.16461 | 3.15E-05 |
| 32180 | TLE6         | 2.16433 | 6.35E-07 |
| 12887 | KCNQ1OT1     | 2.1641  | 2.97E-06 |
| 31210 | SPATS2L      | 2.16393 | 0.000597 |
| 4241  | CMTM8        | 2.16297 | 0.000392 |
| 30933 | SNORD25      | 2.15953 | 0.000363 |
| 2803  | C5ORF13      | 2.15734 | 3.94E-05 |
| 32131 | TIGA1        | 2.15335 | 1.80E-05 |
| 1667  | BMP7         | 2.14281 | 0.000497 |
| 20837 | LOC649946    | 2.14098 | 8.39E-05 |
| 25756 | NCRNA00219   | 2.12543 | 6.42E-07 |
| 8003  | GPM6B        | 2.08967 | 3.45E-05 |
| 5650  | DYM          | 2.08942 | 0.000179 |
| 29606 | S1PR3        | 2.08344 | 0.000479 |
| 27681 | PLEKHA5      | 2.08285 | 0.000217 |
| 11495 | HS.570308    | 2.08044 | 1.67E-06 |
| 26232 | NTN1         | 2.06755 | 2.49E-08 |
| 12635 | IRS1         | 2.06435 | 0.000109 |
| 20404 | LOC648343    | 2.05497 | 0.000791 |
| 29352 | RPL15        | 2.05205 | 2.82E-06 |
| 33800 | WNT5A        | 2.03874 | 1.08E-06 |
| 30481 | SLC38A4      | 2.03653 | 1.13E-06 |
| 12059 | HS.7093      | 2.01993 | 2.66E-06 |
| 22500 | LOC728126    | 2.0183  | 1.16E-06 |
| 16095 | LOC136143    | 2.01775 | 5.71E-05 |
| 12718 | ITPR3        | 2.01384 | 1.67E-05 |
| 4004  | CHN2         | 2.00649 | 7.18E-06 |

|       |              |          |          |
|-------|--------------|----------|----------|
| 32162 | TIPARP       | 2.00538  | 0.000633 |
| 482   | ADSS         | 2.00282  | 0.000136 |
| 2196  | C17ORF45     | 2.00241  | 6.15E-05 |
| 3447  | CCDC51       | -2.00054 | 0.000177 |
| 5945  | ENC1         | -2.0038  | 0.000468 |
| 27915 | POU3F2       | -2.00877 | 2.04E-07 |
| 23143 | LOC729779    | -2.01527 | 0.000972 |
| 23972 | MAP1LC3A     | -2.01892 | 3.37E-06 |
| 7611  | GAS6         | -2.02463 | 9.63E-08 |
| 17062 | LOC399959    | -2.02793 | 2.39E-05 |
| 29519 | RSPO3        | -2.03762 | 1.61E-05 |
| 29038 | RGS20        | -2.04076 | 3.60E-09 |
| 19157 | LOC644936    | -2.04097 | 0.000128 |
| 30502 | SLC3A2       | -2.04467 | 5.58E-05 |
| 33508 | VCAM1        | -2.05421 | 2.51E-06 |
| 490   | AFAP1L2      | -2.05673 | 8.23E-07 |
| 23275 | LOC730167    | -2.06009 | 0.000652 |
| 29215 | RNF175       | -2.06406 | 6.81E-05 |
| 5923  | EMILIN2      | -2.06713 | 2.81E-06 |
| 34367 | ZNF462       | -2.07292 | 1.63E-05 |
| 26244 | NUAK1        | -2.0732  | 0.000172 |
| 25818 | NEBL         | -2.07351 | 1.55E-06 |
| 29624 | SALL3        | -2.0787  | 2.15E-06 |
| 33491 | VANGL2       | -2.08497 | 0.000402 |
| 30581 | SLC7A8       | -2.08722 | 1.40E-08 |
| 875   | ANXA3        | -2.08727 | 0.000227 |
| 34075 | ZFP36L1      | -2.08803 | 5.08E-05 |
| 15637 | LOC100133760 | -2.09319 | 8.14E-05 |
| 1227  | ASNS         | -2.10169 | 8.03E-05 |
| 33804 | WNT7B        | -2.1052  | 3.00E-08 |
| 24064 | MARS         | -2.107   | 0.000146 |
| 33725 | WDR72        | -2.11201 | 0.000617 |
| 31295 | SPRY1        | -2.12339 | 2.43E-05 |
| 7495  | GABARAPL1    | -2.12367 | 1.70E-05 |
| 4331  | COL1A2       | -2.12521 | 1.97E-05 |
| 6821  | FILIP1       | -2.1288  | 0.00026  |

|       |           |          |          |
|-------|-----------|----------|----------|
| 24246 | METR      | -2.13118 | 1.99E-05 |
| 12056 | HS.66187  | -2.13789 | 2.97E-05 |
| 28438 | PTGIS     | -2.14246 | 7.36E-06 |
| 12980 | KIAA0367  | -2.15304 | 1.92E-05 |
| 1575  | BCMO1     | -2.16946 | 7.40E-05 |
| 25473 | MXRA5     | -2.17542 | 3.63E-06 |
| 32537 | TNFAIP1   | -2.17984 | 7.66E-06 |
| 34064 | ZFHX4     | -2.23036 | 0.00046  |
| 28787 | RASL11B   | -2.23056 | 0.000115 |
| 5632  | DUSP6     | -2.23366 | 0.000732 |
| 3149  | CACHD1    | -2.23514 | 5.39E-05 |
| 3221  | CAMKV     | -2.25983 | 5.01E-08 |
| 7248  | FLNC      | -2.26856 | 1.13E-05 |
| 28307 | PRSS8     | -2.28456 | 1.35E-05 |
| 12662 | ISYNA1    | -2.29255 | 1.40E-05 |
| 7524  | GADD45A   | -2.2962  | 7.46E-07 |
| 5921  | EMID2     | -2.29995 | 1.55E-05 |
| 941   | APLP1     | -2.31453 | 2.03E-07 |
| 30576 | SLC7A5    | -2.32091 | 0.000757 |
| 7474  | FZD3      | -2.32644 | 6.13E-06 |
| 5940  | EMX2OS    | -2.3303  | 2.65E-07 |
| 1259  | ATF3      | -2.34034 | 2.59E-06 |
| 33806 | WNT8B     | -2.34155 | 3.96E-08 |
| 31388 | SST       | -2.34663 | 1.83E-06 |
| 3188  | CALCB     | -2.34833 | 3.49E-06 |
| 1075  | ARHGEF6   | -2.35421 | 1.54E-08 |
| 26885 | OTX1      | -2.35607 | 0.00023  |
| 26393 | OLFM3     | -2.35759 | 2.32E-07 |
| 33087 | TUBB2A    | -2.36013 | 0.000777 |
| 31747 | TAGLN     | -2.36809 | 2.16E-05 |
| 5372  | DMRTA1    | -2.36884 | 5.28E-08 |
| 3614  | CD200R1   | -2.37345 | 1.25E-14 |
| 17147 | LOC401056 | -2.37854 | 8.57E-10 |
| 33801 | WNT5B     | -2.3794  | 3.01E-08 |
| 28590 | RAB11FIP1 | -2.40833 | 6.65E-07 |
| 23362 | LOC730525 | -2.41129 | 1.59E-06 |

|       |           |          |          |
|-------|-----------|----------|----------|
| 27658 | PLCH1     | -2.4212  | 3.31E-07 |
| 7000  | FLJ32310  | -2.42179 | 5.77E-06 |
| 3339  | CBX4      | -2.43314 | 1.13E-07 |
| 6073  | ERRFI1    | -2.44539 | 1.44E-05 |
| 32521 | TMSB15A   | -2.45505 | 1.31E-05 |
| 13242 | KLHL14    | -2.51767 | 2.71E-11 |
| 30201 | SIPA1L2   | -2.52018 | 3.67E-06 |
| 32760 | TRIB1     | -2.52274 | 1.73E-06 |
| 13641 | LFNG      | -2.53204 | 5.33E-07 |
| 12285 | IER3      | -2.54594 | 1.65E-07 |
| 28506 | PTPRZ1    | -2.55447 | 1.62E-06 |
| 1608  | BEX2      | -2.56331 | 0.000109 |
| 32179 | TLE4      | -2.56513 | 0.000135 |
| 10888 | HS.551307 | -2.56708 | 0.000405 |
| 683   | ALPK2     | -2.57443 | 2.83E-06 |
| 32551 | TNFRSF12A | -2.59274 | 4.02E-06 |
| 32610 | TNRC9     | -2.59782 | 3.23E-07 |
| 777   | ANKRD1    | -2.61554 | 3.15E-05 |
| 13622 | LEMD1     | -2.62351 | 2.97E-05 |
| 26777 | OR7E156P  | -2.64884 | 3.51E-07 |
| 24377 | MGC39900  | -2.66479 | 1.46E-05 |
| 12267 | ID1       | -2.66562 | 6.68E-07 |
| 27726 | PLP1      | -2.69279 | 9.13E-07 |
| 4350  | COL4A6    | -2.69704 | 1.17E-07 |
| 4320  | COL11A1   | -2.71039 | 1.79E-09 |
| 3127  | CA2       | -2.71276 | 2.35E-08 |
| 26151 | NR2E1     | -2.72059 | 4.25E-14 |
| 31267 | SPOCK1    | -2.7283  | 3.38E-05 |
| 13744 | LIX1      | -2.73818 | 9.34E-06 |
| 32038 | TFPI      | -2.77685 | 6.23E-05 |
| 32776 | TRIM24    | -2.79151 | 8.73E-08 |
| 32756 | TRH       | -2.79963 | 3.98E-07 |
| 32652 | TOX3      | -2.81075 | 9.35E-06 |
| 2405  | C1ORF21   | -2.81457 | 9.49E-09 |
| 5371  | DMRT3     | -2.82614 | 4.28E-09 |
| 32381 | TMEM2     | -2.83489 | 1.83E-05 |

|       |           |          |          |
|-------|-----------|----------|----------|
| 2437  | C1ORF61   | -2.85324 | 3.53E-09 |
| 2868  | C6ORF141  | -2.8569  | 6.05E-06 |
| 1178  | ARX       | -2.87861 | 0.000122 |
| 26245 | NUAK2     | -2.95666 | 4.14E-08 |
| 33796 | WNT2B     | -2.96258 | 1.15E-10 |
| 28507 | PTRF      | -2.97439 | 2.07E-07 |
| 7662  | GCNT1     | -2.98108 | 1.49E-06 |
| 5930  | EMP1      | -2.9918  | 1.11E-06 |
| 31844 | TBC1D9    | -3.00324 | 2.53E-09 |
| 4352  | COL5A2    | -3.02084 | 1.26E-07 |
| 4699  | CTNNA2    | -3.04046 | 6.91E-09 |
| 2516  | C20ORF177 | -3.04277 | 4.86E-08 |
| 3518  | CCL2      | -3.04332 | 9.50E-11 |
| 34315 | ZNF385B   | -3.05084 | 5.56E-07 |
| 12058 | HS.7023   | -3.0642  | 3.72E-08 |
| 23661 | LRIG1     | -3.07681 | 3.30E-07 |
| 7813  | GLI3      | -3.07936 | 1.22E-08 |
| 31513 | STMN2     | -3.09098 | 4.93E-06 |
| 30023 | SFRP1     | -3.09686 | 1.13E-06 |
| 1128  | ARMCX2    | -3.09746 | 2.91E-06 |
| 4689  | CTGF      | -3.11416 | 4.47E-08 |
| 6365  | FAM181A   | -3.1422  | 2.56E-09 |
| 4121  | CLDN1     | -3.15492 | 1.93E-06 |
| 627   | ALDH1A1   | -3.15745 | 1.18E-12 |
| 629   | ALDH1A3   | -3.17887 | 4.46E-13 |
| 33501 | VAT1L     | -3.18253 | 1.21E-06 |
| 4912  | CYR61     | -3.18856 | 3.58E-07 |
| 12781 | KANK4     | -3.20054 | 7.99E-12 |
| 3067  | C9ORF171  | -3.24146 | 3.73E-11 |
| 12363 | IGFBP3    | -3.34999 | 1.02E-06 |
| 4533  | CRIP1     | -3.45501 | 6.62E-08 |
| 3740  | CDH11     | -3.48609 | 2.23E-08 |
| 816   | ANKRD38   | -3.48622 | 6.93E-12 |
| 12730 | JAG1      | -3.58463 | 3.83E-08 |
| 12271 | ID4       | -3.72402 | 1.78E-12 |
| 810   | ANKRD34B  | -3.76606 | 1.15E-11 |

|       |           |          |          |
|-------|-----------|----------|----------|
| 12850 | KCNJ13    | -3.81092 | 2.16E-09 |
| 6112  | ETV5      | -3.81591 | 4.37E-10 |
| 9265  | HS.181245 | -3.86611 | 1.24E-09 |
| 633   | ALDH2     | -3.87108 | 1.97E-09 |
| 26180 | NRIP3     | -3.92066 | 6.08E-08 |
| 30413 | SLC2A1    | -4.11899 | 1.18E-05 |
| 5479  | DOCK11    | -4.35251 | 5.67E-09 |
| 25658 | NAV1      | -4.35259 | 1.02E-10 |
| 5349  | DLL1      | -4.47474 | 1.58E-07 |
| 34418 | ZNF533    | -4.49025 | 1.16E-09 |
| 327   | ACTC1     | -4.63509 | 7.37E-09 |
| 1037  | ARHGAP15  | -4.67561 | 9.89E-10 |
| 31132 | SOX3      | -4.72958 | 7.45E-09 |
| 26153 | NR2F1     | -4.73849 | 1.53E-09 |
| 3129  | CA4       | -4.7904  | 3.00E-09 |
| 33071 | TTYH1     | -4.79045 | 8.94E-14 |
| 5766  | EFHD1     | -4.86615 | 1.16E-09 |
| 867   | ANXA1     | -4.95401 | 1.41E-08 |
| 8500  | HES4      | -5.24189 | 1.63E-11 |
| 4299  | CNTNAP2   | -6.14001 | 2.94E-08 |
| 23947 | MAMDC2    | -6.36522 | 2.23E-10 |
| 7605  | GAS1      | -6.38074 | 2.63E-11 |
| 31151 | SP8       | -8.88965 | 4.42E-20 |
| 30024 | SFRP2     | -9.73482 | 4.24E-14 |
| 13677 | LHX2      | -10.9076 | 6.16E-11 |
| 5939  | EMX2      | -11.5085 | 1.34E-19 |
| 21068 | LOC650757 | -12.1496 | 7.71E-20 |
| 27068 | PAX6      | -15.7636 | 2.24E-22 |
| 5554  | DRD4      | -17.3929 | 3.17E-16 |
| 26065 | NOS2A     | -20.0139 | 2.83E-16 |
| 1501  | BARHL1    | -20.6077 | 2.59E-14 |
| 26064 | NOS2      | -25.1751 | 7.45E-17 |
| 8501  | HES5      | -38.4549 | 8.90E-22 |

**Supplementary Table 1:** Gene expression array data of significantly up-regulated and down-regulated genes at differentiation day 11 in SHH/FGF8/Chir treated Floor-plate based population over control LSB treated population



## **Supplementary Table 2**

| Column # | Probeset ID | Fold-Change | p-value     |
|----------|-------------|-------------|-------------|
| 31575    | SYT4        | 14.8775     | 3.24E-12    |
| 7195     | FOXA1       | 11.8929     | 2.65E-13    |
| 4225     | COL22A1     | 8.26361     | 3.21E-17    |
| 5215     | DKK1        | 6.39507     | 1.32E-08    |
| 7956     | GPR177      | 5.98201     | 5.65E-12    |
| 13508    | LEF1        | 5.07514     | 2.45E-11    |
| 2435     | C20ORF56    | 5.02955     | 2.71E-12    |
| 4928     | DDC         | 5.0147      | 3.23E-08    |
| 11952    | HS.71947    | 4.81098     | 5.13E-09    |
| 13665    | LMX1A       | 4.7485      | 3.59E-10    |
| 12427    | INHBE       | 4.72434     | 3.41E-07    |
| 32562    | TPBG        | 4.63162     | 1.44E-09    |
| 1152     | ATF5        | 4.48583     | 0.000153048 |
| 5369     | DOCK10      | 4.23427     | 4.29E-08    |
| 31414    | STOX1       | 4.20695     | 3.94E-10    |
| 4869     | DBX1        | 4.17519     | 5.31E-09    |
| 31977    | THBS4       | 4.13195     | 3.66E-08    |
| 2694     | C5ORF13     | 4.0095      | 7.84E-10    |
| 31469    | SULF2       | 3.83814     | 8.51E-11    |
| 31468    | SULF1       | 3.81974     | 3.96E-07    |
| 34285    | ZNF503      | 3.81092     | 2.76E-08    |
| 12531    | IRX3        | 3.73598     | 3.93E-06    |
| 4935     | DDIT4       | 3.73152     | 3.78E-05    |
| 31369    | STC2        | 3.70632     | 8.48E-08    |
| 27482    | PKDCC       | 3.69823     | 2.20E-07    |
| 4257     | COLEC12     | 3.6503      | 5.20E-06    |
| 31926    | TFF3        | 3.62059     | 1.12E-08    |
| 25244    | MSX1        | 3.60243     | 0.000146141 |
| 23475    | LOC91461    | 3.58231     | 2.08E-06    |
| 26777    | OTX2        | 3.47814     | 3.97E-09    |
| 13489    | LDB2        | 3.44124     | 3.22E-07    |
| 13657    | LMO3        | 3.29197     | 2.61E-12    |
| 817      | APCDD1      | 3.21277     | 6.95E-10    |
| 4822     | DAB2        | 3.18324     | 1.84E-09    |



|       |          |         |             |
|-------|----------|---------|-------------|
| 25760 | NEUROG2  | 3.16851 | 1.30E-07    |
| 31101 | SPATS2L  | 3.15744 | 2.80E-06    |
| 1311  | AXIN2    | 3.13274 | 1.80E-06    |
| 32448 | TNFRSF19 | 3.11104 | 2.48E-10    |
| 4934  | DDIT3    | 3.08248 | 4.83E-05    |
| 26776 | OTX1     | 3.05293 | 6.14E-06    |
| 28360 | PTPN13   | 3.03567 | 5.18E-06    |
| 994   | ARL4A    | 2.98803 | 1.45E-07    |
| 26728 | OSBPL10  | 2.94508 | 5.19E-06    |
| 32836 | TSPAN7   | 2.86094 | 1.65E-05    |
| 5665  | EFNB2    | 2.78085 | 0.000222563 |
| 8101  | GSC      | 2.75066 | 3.46E-07    |
| 6426  | FAM84B   | 2.74213 | 7.89E-07    |
| 29866 | SERPINF1 | 2.73192 | 1.26E-08    |
| 924   | ARHGAP10 | 2.72522 | 3.36E-07    |
| 31039 | SP5      | 2.68162 | 9.57E-07    |
| 28210 | PSAT1    | 2.64735 | 9.82E-06    |
| 28933 | RGS4     | 2.6312  | 0.000148375 |
| 13547 | LGI1     | 2.61567 | 1.30E-06    |
| 7369  | FZD7     | 2.61404 | 2.46E-06    |
| 25351 | MUSTN1   | 2.55841 | 4.85E-07    |
| 25411 | MYL4     | 2.55345 | 4.77E-09    |
| 28424 | PVRL3    | 2.55083 | 1.04E-07    |
| 299   | ADAMTS9  | 2.53131 | 2.88E-08    |
| 1555  | BMP4     | 2.52708 | 9.40E-05    |
| 31161 | SPON1    | 2.5133  | 0.000145864 |
| 26265 | ODZ4     | 2.50312 | 1.46E-05    |
| 33730 | XBP1     | 2.50164 | 1.72E-06    |
| 28766 | RBP1     | 2.49237 | 6.12E-05    |
| 12533 | IRX5     | 2.48929 | 7.43E-07    |
| 1118  | ASNS     | 2.47416 | 4.50E-06    |
| 2770  | C6ORF160 | 2.40219 | 3.58E-05    |
| 12337 | IL1RAPL1 | 2.40145 | 3.15E-06    |
| 12526 | IRS1     | 2.3994  | 7.70E-06    |
| 7221  | FOXJ1    | 2.39492 | 8.89E-05    |
| 28647 | RARB     | 2.37013 | 9.11E-09    |

|       |              |         |             |
|-------|--------------|---------|-------------|
| 14472 | LOC100130506 | 2.36331 | 1.36E-06    |
| 3979  | CITED2       | 2.36201 | 2.92E-05    |
| 31430 | STT3B        | 2.34069 | 1.29E-05    |
| 26023 | NPY          | 2.3346  | 1.98E-05    |
| 6052  | EYA2         | 2.3192  | 0.000136915 |
| 26991 | PCDH17       | 2.31776 | 8.71E-05    |
| 26127 | NTNG1        | 2.31615 | 1.30E-06    |
| 373   | ADSS         | 2.29099 | 1.20E-05    |
| 6120  | FAM107A      | 2.26256 | 0.000677009 |
| 28387 | PTPRM        | 2.25934 | 1.41E-05    |
| 31572 | SYT17        | 2.257   | 7.10E-05    |
| 7143  | FLRT2        | 2.24042 | 1.35E-07    |
| 32372 | TMEM88       | 2.2394  | 4.55E-05    |
| 27552 | PLCL2        | 2.23488 | 1.24E-06    |
| 5681  | EGLN3        | 2.23059 | 0.000841858 |
| 3837  | CHAC1        | 2.22744 | 2.61E-05    |
| 26045 | NR2F2        | 2.21836 | 1.71E-05    |
| 7196  | FOXA2        | 2.21691 | 8.01E-05    |
| 12950 | KIAA1324L    | 2.18683 | 6.09E-05    |
| 3667  | CDK6         | 2.1717  | 0.00076066  |
| 9540  | HS.36053     | 2.15618 | 5.44E-07    |
| 19012 | LOC644860    | 2.15508 | 7.00E-06    |
| 4366  | CPNE8        | 2.15418 | 9.80E-06    |
| 4936  | DDIT4L       | 2.14147 | 0.000195501 |
| 29691 | SDCBP        | 2.13721 | 3.10E-05    |
| 7144  | FLRT3        | 2.11969 | 0.00033768  |
| 5851  | ENPP2        | 2.10048 | 0.000485738 |
| 1558  | BMP7         | 2.0876  | 0.000718573 |
| 23514 | LPAR4        | 2.08062 | 1.96E-06    |
| 23554 | LRIG3        | 2.07935 | 1.81E-06    |
| 5964  | ERRFI1       | 2.07249 | 0.000220066 |
| 3623  | CDCA7        | 2.07177 | 0.000280326 |
| 30635 | SNHG5        | 2.0594  | 4.95E-06    |
| 32620 | TRAM2        | 2.04784 | 0.000111169 |
| 12809 | KCTD6        | 2.04602 | 0.000114945 |
| 28901 | RGL1         | 2.04043 | 0.000167278 |

|       |              |          |             |
|-------|--------------|----------|-------------|
| 30628 | SNHG1        | 2.03706  | 0.000252445 |
| 27947 | PPPDE1       | 2.02017  | 2.69E-05    |
| 5434  | DPYSL3       | -2.00257 | 0.000139976 |
| 23863 | MAP1LC3A     | -2.00377 | 4.01E-06    |
| 24226 | MGC18216     | -2.01184 | 0.000204988 |
| 4818  | D4S234E      | -2.01244 | 8.77E-05    |
| 4825  | DACH2        | -2.01277 | 8.71E-07    |
| 4386  | CPXM2        | -2.02106 | 2.02E-05    |
| 32224 | TMEM169      | -2.02651 | 0.000222019 |
| 151   | ACBD7        | -2.03074 | 6.94E-05    |
| 8643  | HOOK1        | -2.03984 | 1.85E-05    |
| 4278  | COPG2IT1     | -2.04004 | 8.62E-07    |
| 32981 | TUBB3        | -2.04044 | 0.000989413 |
| 5887  | EPHA1        | -2.05082 | 1.41E-06    |
| 28929 | RGS20        | -2.06283 | 2.60E-09    |
| 28068 | PRKCH        | -2.06869 | 4.13E-06    |
| 33539 | WBP2         | -2.0692  | 0.000157614 |
| 23711 | LY6E         | -2.07026 | 8.93E-05    |
| 29803 | SEPP1        | -2.08034 | 2.48E-05    |
| 12713 | KCND2        | -2.08768 | 1.63E-08    |
| 34309 | ZNF533       | -2.08871 | 0.000231468 |
| 14009 | LOC100129034 | -2.09106 | 4.54E-07    |
| 25915 | NMU          | -2.09244 | 0.000184692 |
| 24132 | MEST         | -2.09269 | 2.92E-06    |
| 2715  | C5ORF41      | -2.09563 | 1.42E-05    |
| 27778 | PON2         | -2.09758 | 1.79E-05    |
| 24105 | MEG3         | -2.10214 | 5.69E-07    |
| 31812 | TCF7L2       | -2.10261 | 0.000153698 |
| 33783 | YBX2         | -2.1118  | 6.90E-06    |
| 28329 | PTGIS        | -2.11465 | 9.61E-06    |
| 6694  | FHDC1        | -2.11553 | 8.86E-06    |
| 24175 | MFNG         | -2.11579 | 2.95E-05    |
| 6640  | FEZ1         | -2.11631 | 2.58E-06    |
| 2407  | C20ORF177    | -2.12232 | 3.62E-05    |
| 26783 | OVOL2        | -2.12627 | 3.53E-07    |
| 28883 | RFTN2        | -2.13498 | 7.25E-08    |

|       |            |          |             |
|-------|------------|----------|-------------|
| 19038 | LOC644919  | -2.13675 | 2.95E-06    |
| 30004 | SH3BP4     | -2.13785 | 0.000314453 |
| 31020 | SOX2       | -2.14642 | 0.000107169 |
| 16268 | LOC284422  | -2.16056 | 1.07E-05    |
| 4819  | DAAM1      | -2.16701 | 3.85E-05    |
| 32404 | TMPRSS2    | -2.1693  | 6.26E-07    |
| 26668 | OR7E156P   | -2.17193 | 1.53E-05    |
| 12609 | ITPR3      | -2.18226 | 3.09E-06    |
| 6372  | FAM65B     | -2.18271 | 1.37E-06    |
| 12635 | JARID2     | -2.18541 | 4.46E-05    |
| 25024 | MOBK2B     | -2.19737 | 5.45E-05    |
| 31567 | SYT13      | -2.19832 | 2.30E-05    |
| 25658 | NDRG1      | -2.20101 | 5.25E-07    |
| 24318 | MGST3      | -2.20252 | 3.24E-07    |
| 2147  | C18ORF26   | -2.2117  | 2.55E-06    |
| 31010 | SOSTDC1    | -2.21381 | 2.23E-08    |
| 4662  | CXCL14     | -2.21955 | 1.81E-08    |
| 33161 | UCA1       | -2.21966 | 2.19E-05    |
| 12176 | IER3       | -2.21992 | 2.75E-06    |
| 7171  | FNBP1      | -2.23104 | 1.98E-05    |
| 12199 | IFITM3     | -2.23167 | 4.22E-06    |
| 25635 | NCRNA00153 | -2.24173 | 2.01E-05    |
| 27531 | PLAC9      | -2.24346 | 9.11E-08    |
| 25743 | NES        | -2.2469  | 3.16E-06    |
| 31405 | STMN3      | -2.25856 | 0.000796798 |
| 7536  | GCA        | -2.27697 | 1.34E-05    |
| 12275 | IGSF3      | -2.28535 | 4.08E-06    |
| 17038 | LOC401056  | -2.2854  | 2.45E-09    |
| 4533  | CSRP2      | -2.28899 | 0.000244001 |
| 31606 | TACSTD1    | -2.28933 | 0.000115538 |
| 29372 | RRAGD      | -2.29258 | 0.000537359 |
| 5884  | EPCAM      | -2.29475 | 0.00099285  |
| 28398 | PTRF       | -2.29476 | 1.92E-05    |
| 12672 | KANK4      | -2.29735 | 1.73E-08    |
| 3505  | CD200R1    | -2.30795 | 3.06E-14    |
| 33264 | UPK2       | -2.30847 | 1.37E-10    |

|       |              |          |             |
|-------|--------------|----------|-------------|
| 8911  | HS.130036    | -2.31161 | 3.95E-05    |
| 24978 | MMD          | -2.317   | 1.46E-05    |
| 6002  | ETV4         | -2.32842 | 6.04E-09    |
| 27655 | PMP22        | -2.33585 | 4.94E-12    |
| 5657  | EFHD1        | -2.33997 | 7.47E-05    |
| 31186 | SPRY1        | -2.34859 | 3.56E-06    |
| 3631  | CDH11        | -2.35006 | 1.77E-05    |
| 29555 | SAT1         | -2.35602 | 2.21E-05    |
| 33268 | UPP1         | -2.36162 | 5.38E-08    |
| 1968  | C14ORF4      | -2.36739 | 2.59E-06    |
| 9512  | HS.34447     | -2.37168 | 7.49E-08    |
| 16243 | LOC283953    | -2.38022 | 4.57E-07    |
| 3203  | CAV2         | -2.38208 | 1.09E-11    |
| 26223 | NYNRIN       | -2.40311 | 1.90E-05    |
| 22623 | LOC728715    | -2.41353 | 0.000504831 |
| 25084 | MPPED2       | -2.42024 | 6.42E-10    |
| 13403 | LAMC2        | -2.42245 | 5.32E-10    |
| 25083 | MPPED1       | -2.42332 | 3.73E-14    |
| 13402 | LAMC1        | -2.43845 | 7.40E-05    |
| 15722 | LOC100134265 | -2.44777 | 4.60E-06    |
| 5836  | ENC1         | -2.45175 | 1.84E-05    |
| 244   | ACVR2A       | -2.46307 | 1.87E-06    |
| 33616 | WDR72        | -2.46656 | 6.61E-05    |
| 28509 | RAB31        | -2.47199 | 1.57E-06    |
| 3629  | CDH1         | -2.4799  | 3.05E-06    |
| 28905 | RGMA         | -2.50113 | 4.45E-06    |
| 29475 | S100A11      | -2.50568 | 3.24E-06    |
| 8259  | HAPLN1       | -2.50809 | 7.14E-07    |
| 3942  | CHST7        | -2.51075 | 9.78E-08    |
| 12543 | ISL1         | -2.51716 | 2.76E-10    |
| 28305 | PTCH1        | -2.52418 | 7.32E-08    |
| 32541 | TOX          | -2.5288  | 5.34E-09    |
| 6067  | F2RL1        | -2.54309 | 2.36E-08    |
| 32334 | TMEM54       | -2.57701 | 2.04E-06    |
| 3436  | CCND1        | -2.58061 | 6.72E-05    |
| 707   | ANKRD38      | -2.58621 | 4.12E-09    |

|       |           |          |             |
|-------|-----------|----------|-------------|
| 5241  | DLL3      | -2.5911  | 8.77E-08    |
| 33424 | VGf       | -2.59836 | 0.000406676 |
| 23253 | LOC730525 | -2.61609 | 3.32E-07    |
| 31368 | STC1      | -2.63136 | 1.20E-05    |
| 31910 | TFAP2C    | -2.63773 | 4.72E-08    |
| 25012 | MN1       | -2.6469  | 8.33E-08    |
| 28419 | PVALB     | -2.67012 | 1.23E-10    |
| 6960  | FLJ37644  | -2.67066 | 1.78E-12    |
| 7417  | GADD45G   | -2.68804 | 2.14E-06    |
| 4709  | CXXC4     | -2.68958 | 5.39E-07    |
| 8050  | GRHL3     | -2.73097 | 4.15E-11    |
| 23990 | MBIP      | -2.73995 | 9.29E-07    |
| 5418  | DPPA4     | -2.75778 | 5.66E-08    |
| 32212 | TMEM158   | -2.77503 | 9.30E-06    |
| 5896  | EPHB1     | -2.77518 | 2.29E-06    |
| 31404 | STMN2     | -2.79651 | 2.03E-05    |
| 12454 | INSM1     | -2.81526 | 1.15E-09    |
| 13142 | KLHL24    | -2.81638 | 2.31E-07    |
| 9856  | HS.475334 | -2.82304 | 1.09E-05    |
| 33125 | UBL3      | -2.85607 | 2.77E-08    |
| 13655 | LMO1      | -2.90621 | 4.10E-06    |
| 6003  | ETV5      | -2.90987 | 5.54E-08    |
| 966   | ARHGEF6   | -2.92751 | 9.82E-11    |
| 31187 | SPRY2     | -2.94814 | 6.74E-09    |
| 28501 | RAB25     | -2.97139 | 5.77E-07    |
| 4675  | CXCR7     | -2.9864  | 6.13E-07    |
| 32652 | TRIB2     | -2.99455 | 8.47E-08    |
| 28397 | PTPRZ1    | -3.02099 | 8.00E-08    |
| 31158 | SPOCK1    | -3.02198 | 8.12E-06    |
| 25849 | NKD2      | -3.02555 | 4.12E-11    |
| 25471 | MYT1      | -3.03712 | 6.21E-09    |
| 6856  | FLJ25404  | -3.03813 | 1.95E-08    |
| 30304 | SLC2A1    | -3.05478 | 0.000275534 |
| 12256 | IGFBP5    | -3.06686 | 2.00E-06    |
| 23779 | MAF       | -3.07491 | 2.81E-08    |
| 28198 | PRSS8     | -3.08336 | 6.31E-08    |

|       |           |          |          |
|-------|-----------|----------|----------|
| 9923  | HS.509165 | -3.09539 | 2.57E-07 |
| 4243  | COL5A2    | -3.10066 | 8.01E-08 |
| 3112  | CAMKV     | -3.10668 | 3.37E-11 |
| 29915 | SFRP2     | -3.13051 | 3.42E-07 |
| 13092 | KIT       | -3.13441 | 8.27E-12 |
| 6684  | FGFR3     | -3.13726 | 7.73E-09 |
| 8646  | HOPX      | -3.15424 | 1.07E-14 |
| 29497 | S1PR3     | -3.15587 | 8.43E-07 |
| 33399 | VCAM1     | -3.15952 | 2.02E-10 |
| 5240  | DLL1      | -3.18075 | 1.28E-05 |
| 28112 | PRODH     | -3.18595 | 2.33E-07 |
| 23200 | LOC730278 | -3.27115 | 1.92E-07 |
| 1202  | ATP1B2    | -3.29446 | 2.34E-08 |
| 6720  | FJX1      | -3.3039  | 6.85E-07 |
| 3609  | CDC42EP4  | -3.33348 | 2.25E-09 |
| 12198 | IFITM2    | -3.35237 | 3.41E-11 |
| 3679  | CDKN1C    | -3.37225 | 1.15E-09 |
| 3202  | CAV1      | -3.37517 | 5.73E-13 |
| 31171 | SPRED1    | -3.42954 | 3.76E-08 |
| 30010 | SH3GL3    | -3.43813 | 3.73E-11 |
| 8335  | HDC       | -3.45787 | 1.51E-12 |
| 8391  | HES4      | -3.49495 | 1.00E-08 |
| 33335 | USP44     | -3.50303 | 6.22E-11 |
| 1101  | ASCL1     | -3.54534 | 1.26E-11 |
| 29945 | SFTA3     | -3.5611  | 1.59E-07 |
| 13619 | LIPA      | -3.56979 | 1.34E-08 |
| 27178 | PDPN      | -3.72978 | 5.33E-12 |
| 7370  | FZD8      | -3.74383 | 7.14E-09 |
| 3647  | CDH3      | -3.80687 | 3.54E-09 |
| 2759  | C6ORF141  | -3.94476 | 5.10E-08 |
| 13595 | LIMCH1    | -3.94759 | 2.52E-11 |
| 13513 | LEMD1     | -3.98954 | 6.68E-08 |
| 5961  | ERP27     | -4.02755 | 8.38E-13 |
| 29666 | SCRG1     | -4.03799 | 1.96E-17 |
| 7286  | FRZB      | -4.04927 | 2.19E-05 |
| 12977 | KIAA1598  | -4.04996 | 4.12E-09 |

|       |              |          |          |
|-------|--------------|----------|----------|
| 2380  | C20ORF100    | -4.16273 | 2.94E-12 |
| 25866 | NKX6-2       | -4.17171 | 1.46E-10 |
| 31030 | SOX9         | -4.21749 | 9.69E-10 |
| 27805 | POU3F1       | -4.22404 | 1.53E-11 |
| 7879  | GPC4         | -4.23918 | 8.64E-08 |
| 17977 | LOC642590    | -4.36113 | 1.29E-10 |
| 19608 | LOC646347    | -4.53146 | 1.77E-08 |
| 5238  | DLK1         | -4.62809 | 8.12E-05 |
| 8401  | HEY1         | -4.68961 | 2.52E-12 |
| 30592 | SMS          | -4.74656 | 5.18E-12 |
| 29914 | SFRP1        | -4.84227 | 1.53E-09 |
| 13376 | LITD1        | -4.85832 | 6.96E-08 |
| 7984  | GPR56        | -4.87971 | 1.88E-13 |
| 7367  | FZD5         | -5.00247 | 2.43E-11 |
| 25858 | NKX2-1       | -5.06868 | 2.84E-08 |
| 7801  | GNG8         | -5.39693 | 2.22E-13 |
| 9156  | HS.181245    | -5.99308 | 1.43E-12 |
| 32962 | TTYH1        | -6.33607 | 1.00E-15 |
| 5523  | DUSP6        | -6.34711 | 8.15E-10 |
| 6091  | FABP7        | -6.56016 | 2.28E-09 |
| 5248  | DLX5         | -6.56829 | 8.74E-13 |
| 12754 | KCNK12       | -6.912   | 1.07E-12 |
| 30165 | SLC15A3      | -7.17663 | 1.60E-19 |
| 6675  | FGF8         | -7.58196 | 1.32E-18 |
| 31023 | SOX3         | -7.63996 | 1.53E-11 |
| 8395  | HESX1        | -8.28818 | 3.36E-10 |
| 28692 | RAX          | -8.87763 | 6.24E-12 |
| 20959 | LOC650757    | -9.74543 | 1.18E-18 |
| 14470 | LOC100130502 | -10.333  | 1.53E-10 |
| 13568 | LHX2         | -14.1638 | 4.81E-12 |
| 30111 | SIX3         | -15.019  | 8.24E-13 |
| 12197 | IFITM1       | -16.4704 | 9.16E-16 |
| 25859 | NKX2-2       | -18.6642 | 7.93E-20 |
| 12254 | IGFBP3       | -19.1294 | 8.81E-16 |
| 8392  | HES5         | -33.7356 | 2.69E-21 |
| 30114 | SIX6         | -39.4411 | 2.59E-18 |



**Supplementary Table 2:** Gene expression array data of significantly up-regulated and down-regulated genes at differentiation day 11 in SHH/FGF8/Chir treated Floor-plate based population over SHH/FGF8 only treated population.

### **Supplementary Table 3**

| Column # | Column ID | Fold-Change | p-value  |
|----------|-----------|-------------|----------|
| 1209     | ASCL1     | 33.085      | 1.60E-09 |
| 3978     | CHGA      | 28.1727     | 4.44E-13 |
| 31604    | STMN2     | 20.9978     | 1.47E-08 |
| 32159    | TH        | 15.2965     | 2.12E-08 |
| 31606    | STMN4     | 15.2102     | 3.72E-09 |
| 7685     | GAP43     | 12.5729     | 5.42E-09 |
| 4926     | D4S234E   | 10.7914     | 4.91E-08 |
| 8593     | HES6      | 10.6527     | 2.94E-09 |
| 4342     | COL3A1    | 10.0606     | 3.86E-06 |
| 12149    | HS.7023   | 9.60731     | 3.97E-08 |
| 5691     | EBF3      | 9.28771     | 5.13E-11 |
| 29820    | SCG2      | 9.22584     | 1.02E-06 |
| 12655    | INSM2     | 9.01409     | 3.73E-12 |
| 27988    | POSTN     | 8.79262     | 1.09E-10 |
| 28590    | PTPRO     | 8.70512     | 3.13E-10 |
| 30386    | SLC17A6   | 8.22904     | 2.02E-06 |
| 31767    | SYT13     | 8.1735      | 3.63E-07 |
| 30390    | SLC18A1   | 8.15448     | 6.47E-15 |
| 5689     | EBF1      | 8.05344     | 2.30E-06 |
| 5029     | DCX       | 8.00552     | 8.30E-08 |
| 2470     | C1QL1     | 7.47022     | 8.68E-10 |
| 12609    | INA       | 6.92121     | 5.72E-07 |
| 26250    | NR4A2     | 6.75723     | 1.27E-13 |
| 29624    | RTN1      | 6.6247      | 6.52E-07 |
| 9374     | HS.19193  | 6.58382     | 1.95E-08 |
| 436      | ADCYAP1   | 6.49154     | 9.75E-11 |
| 1607     | BEX2      | 6.33986     | 8.93E-09 |
| 34098    | ZCCHC12   | 6.19663     | 9.95E-07 |
| 7056     | FLJ25404  | 6.19296     | 2.14E-06 |
| 31605    | STMN3     | 6.17605     | 8.77E-07 |
| 7997     | GNG3      | 6.1196      | 1.26E-06 |
| 25922    | NEFM      | 6.11347     | 2.51E-04 |
| 12359    | ID2       | 6.07844     | 1.32E-06 |

|       |              |         |          |
|-------|--------------|---------|----------|
| 29017 | REEP1        | 6.04393 | 2.25E-06 |
| 30810 | SNAP25       | 6.03677 | 3.62E-06 |
| 25671 | MYT1         | 5.86419 | 8.19E-06 |
| 33297 | UBE2J1       | 5.76887 | 6.22E-08 |
| 5349  | DLL3         | 5.76451 | 4.92E-08 |
| 29133 | RGS4         | 5.69761 | 1.87E-06 |
| 28123 | PPP2R2B      | 5.56067 | 2.80E-08 |
| 27287 | PCSK1N       | 5.43156 | 3.22E-09 |
| 32126 | TFF3         | 5.26964 | 3.17E-08 |
| 27288 | PCSK2        | 5.22877 | 9.14E-10 |
| 4533  | CRIP2        | 5.18375 | 8.40E-08 |
| 12506 | IL13RA2      | 5.1246  | 1.31E-06 |
| 32417 | TMEM163      | 5.01765 | 7.55E-09 |
| 30813 | SNAP91       | 4.92061 | 4.28E-05 |
| 13260 | KIF5C        | 4.86241 | 2.93E-06 |
| 15798 | LOC100133923 | 4.83074 | 3.74E-07 |
| 32412 | TMEM158      | 4.76646 | 4.81E-06 |
| 3770  | CDK5R1       | 4.75524 | 1.18E-05 |
| 5739  | EEF1A2       | 4.75232 | 9.53E-05 |
| 32697 | TNRC4        | 4.75179 | 1.29E-05 |
| 5455  | DNER         | 4.71709 | 1.52E-05 |
| 6700  | FAT3         | 4.68785 | 1.91E-06 |
| 6197  | ETS2         | 4.67343 | 1.08E-10 |
| 25753 | NBEA         | 4.65265 | 6.99E-07 |
| 12944 | KCNJ16       | 4.53077 | 3.54E-12 |
| 3979  | CHGB         | 4.52218 | 7.76E-05 |
| 25562 | MXD4         | 4.445   | 7.25E-07 |
| 3941  | CGNL1        | 4.44195 | 7.24E-06 |
| 26499 | ONECUT2      | 4.37403 | 2.39E-07 |
| 2867  | C6ORF141     | 4.35252 | 2.58E-10 |
| 12362 | ID4          | 4.32183 | 6.05E-05 |
| 26011 | NHLH2        | 4.31928 | 5.91E-05 |
| 2035  | C14ORF132    | 4.31666 | 9.46E-07 |
| 9428  | HS.204481    | 4.29602 | 1.66E-09 |
| 8288  | GRM8         | 4.17846 | 1.62E-06 |
| 7617  | GADD45G      | 4.17663 | 2.21E-06 |

|       |           |         |             |
|-------|-----------|---------|-------------|
| 4298  | CNTNAP2   | 4.13552 | 4.10E-05    |
| 1408  | AUTS2     | 4.13111 | 2.79E-05    |
| 23822 | LRRC4C    | 4.11703 | 1.27E-09    |
| 31454 | SRRM4     | 4.11574 | 8.04E-07    |
| 4003  | CHN2      | 4.09589 | 3.30E-07    |
| 27665 | PITX2     | 4.08382 | 1.94E-11    |
| 13296 | KLC1      | 4.0528  | 4.19E-06    |
| 27773 | PLEKHA6   | 4.0464  | 2.57E-07    |
| 25618 | MYLIP     | 3.99268 | 2.96E-06    |
| 5036  | DDC       | 3.96553 | 8.46E-05    |
| 33181 | TUBB3     | 3.93922 | 1.52E-04    |
| 24522 | MIAT      | 3.93906 | 9.87E-05    |
| 27411 | PEG10     | 3.9374  | 3.48E-05    |
| 32343 | TMEFF2    | 3.92112 | 6.49E-07    |
| 29821 | SCG3      | 3.92108 | 6.47E-06    |
| 31759 | SYP       | 3.89869 | 2.51E-04    |
| 9425  | HS.202577 | 3.89053 | 2.85E-07    |
| 33943 | XKR4      | 3.87043 | 1.49E-06    |
| 33178 | TUBB2A    | 3.86265 | 6.11E-05    |
| 12654 | INSM1     | 3.84646 | 5.59E-05    |
| 13236 | KIF1A     | 3.84543 | 3.27E-05    |
| 25721 | NAPB      | 3.81995 | 3.50E-05    |
| 31765 | SYT11     | 3.77827 | 1.14E-05    |
| 5877  | ELAVL3    | 3.70028 | 9.69E-05    |
| 13858 | LMO4      | 3.69359 | 2.09E-06    |
| 4103  | CLASP2    | 3.64468 | 1.79E-05    |
| 2956  | C7ORF41   | 3.63616 | 5.69E-05    |
| 33362 | UCHL1     | 3.61003 | 5.64E-05    |
| 29645 | RUNDC3A   | 3.54448 | 8.42E-05    |
| 24063 | MAP1LC3A  | 3.53736 | 4.36E-06    |
| 5944  | ENC1      | 3.51677 | 0.000141473 |
| 28730 | RAB40B    | 3.48084 | 4.57E-07    |
| 25162 | MLLT11    | 3.4633  | 3.13E-05    |
| 7469  | FRMD4A    | 3.46181 | 7.40E-06    |
| 13070 | KIAA0363  | 3.43032 | 6.39E-05    |
| 13342 | KLHL24    | 3.41191 | 3.34E-05    |

|       |              |         |             |
|-------|--------------|---------|-------------|
| 7988  | GNB3         | 3.38669 | 3.31E-09    |
| 31840 | TAGLN3       | 3.36355 | 1.67E-03    |
| 12147 | HS.66187     | 3.34592 | 0.000125172 |
| 4549  | CRMP1        | 3.32015 | 2.42E-04    |
| 23453 | LOC730525    | 3.31501 | 1.64E-03    |
| 31514 | ST6GALNAC5   | 3.29449 | 1.19E-05    |
| 27054 | PAFAH1B1     | 3.25816 | 1.30E-04    |
| 32432 | TMEM170B     | 3.25165 | 2.44E-05    |
| 27686 | PKIA         | 3.24255 | 4.29E-05    |
| 1748  | BSN          | 3.2101  | 0.000169219 |
| 6213  | EVL          | 3.17682 | 3.36E-05    |
| 34217 | ZMIZ1        | 3.16249 | 3.29E-04    |
| 16419 | LOC283514    | 3.15057 | 4.57E-06    |
| 32081 | TERF2IP      | 3.13818 | 3.43E-05    |
| 4932  | DACH1        | 3.11457 | 7.79E-06    |
| 5424  | DNAJC19      | 3.09946 | 1.64E-09    |
| 8093  | GPM6A        | 3.07619 | 1.59E-03    |
| 15034 | LOC100131718 | 3.0686  | 4.01E-05    |
| 8706  | HIST1H4K     | 3.06394 | 1.84E-06    |
| 28238 | PRICKLE2     | 3.06341 | 1.98E-06    |
| 31429 | SRGAP3       | 3.0575  | 7.84E-06    |
| 13760 | LHFP         | 3.04812 | 0.000126565 |
| 3181  | CADPS        | 3.03806 | 6.60E-06    |
| 3186  | CALCA        | 3.03372 | 3.13E-08    |
| 1672  | BMPR2        | 3.03171 | 9.26E-06    |
| 25861 | NDRG4        | 3.00851 | 0.000239868 |
| 2265  | C18ORF8      | 2.99462 | 9.07E-06    |
| 4698  | CTNNA2       | 2.962   | 6.07E-05    |
| 1606  | BEX1         | 2.96088 | 5.37E-05    |
| 32769 | TPH1         | 2.96087 | 2.88E-07    |
| 31986 | TCEAL7       | 2.95947 | 3.43E-05    |
| 3322  | CBLN2        | 2.95729 | 1.12E-04    |
| 29639 | RUFY3        | 2.95504 | 2.59E-05    |
| 3851  | CELSR3       | 2.9545  | 6.27E-04    |
| 3177  | CADM1        | 2.95335 | 1.81E-04    |
| 20895 | LOC649841    | 2.94392 | 2.21E-05    |

|       |           |         |             |
|-------|-----------|---------|-------------|
| 13713 | LEMD1     | 2.93152 | 9.17E-06    |
| 8184  | GPR56     | 2.93095 | 3.08E-04    |
| 31935 | TBC1D9    | 2.92862 | 6.60E-05    |
| 8046  | GOLSYN    | 2.9099  | 2.80E-06    |
| 33004 | TSHZ1     | 2.90158 | 2.76E-07    |
| 5876  | ELAVL2    | 2.90115 | 0.00136166  |
| 12733 | IRX5      | 2.88659 | 1.21E-04    |
| 1254  | ATCAY     | 2.86583 | 7.41E-04    |
| 31763 | SYT1      | 2.86449 | 1.02E-03    |
| 29193 | RIMBP2    | 2.84834 | 6.29E-06    |
| 28741 | RAB6B     | 2.84821 | 0.000698361 |
| 27533 | PHF21B    | 2.8457  | 6.44E-05    |
| 24135 | MAPT      | 2.83633 | 5.22E-04    |
| 10116 | HS.505676 | 2.83499 | 1.50E-05    |
| 8712  | HIST2H2BE | 2.82687 | 0.000157254 |
| 24061 | MAP1B     | 2.82235 | 0.000357426 |
| 13054 | KIAA0182  | 2.8162  | 2.66E-04    |
| 34044 | ZBTB20    | 2.81539 | 8.77E-08    |
| 29509 | RPRM      | 2.81168 | 0.000475144 |
| 34007 | YPEL5     | 2.81061 | 1.16E-04    |
| 13609 | LANCL2    | 2.80004 | 8.07E-06    |
| 940   | APLP1     | 2.77078 | 2.57E-05    |
| 29849 | SCN3B     | 2.76654 | 7.14E-05    |
| 29201 | RIMS3     | 2.76205 | 2.94E-04    |
| 27394 | PDZD4     | 2.75594 | 0.000212095 |
| 1364  | ATP6V1G2  | 2.75366 | 0.0012022   |
| 31778 | SYT7      | 2.74946 | 4.15E-05    |
| 32351 | TMEM106A  | 2.73965 | 0.000217998 |
| 7717  | GATS      | 2.72521 | 3.10E-05    |
| 506   | AGAP3     | 2.71696 | 2.07E-05    |
| 24141 | MARCH4    | 2.70659 | 8.96E-04    |
| 5348  | DLL1      | 2.7028  | 2.05E-04    |
| 6212  | EVI5L     | 2.6886  | 6.79E-05    |
| 3196  | CALM1     | 2.68129 | 8.50E-05    |
| 31386 | SPRY1     | 2.67788 | 1.15E-03    |
| 33128 | TTR       | 2.66999 | 2.76E-05    |

|       |              |         |             |
|-------|--------------|---------|-------------|
| 33765 | WDR22        | 2.66565 | 2.95E-04    |
| 297   | ACPL2        | 2.66551 | 1.52E-06    |
| 5325  | DKK3         | 2.65119 | 5.63E-05    |
| 23853 | LRRN3        | 2.64615 | 1.37E-03    |
| 32615 | TMSL3        | 2.63733 | 4.56E-05    |
| 29822 | SCG5         | 2.63452 | 1.42E-04    |
| 32000 | TCF12        | 2.63327 | 1.80E-06    |
| 3497  | CCDC92       | 2.6296  | 2.23E-05    |
| 5610  | DUSP1        | 2.60841 | 1.78E-04    |
| 14524 | LOC100130053 | 2.60135 | 4.53E-04    |
| 26279 | NRSN1        | 2.59336 | 0.00111467  |
| 25711 | NANOS3       | 2.58916 | 4.15E-06    |
| 5543  | DPYSL4       | 2.58236 | 0.000223516 |
| 6231  | EXOC7        | 2.58163 | 4.89E-06    |
| 24134 | MAPRE3       | 2.57689 | 4.85E-05    |
| 9382  | HS.193784    | 2.57602 | 2.18E-06    |
| 1608  | BEX4         | 2.57251 | 9.83E-05    |
| 6514  | FAM36A       | 2.56726 | 7.62E-05    |
| 13640 | LBH          | 2.56551 | 1.34E-05    |
| 9920  | HS.437111    | 2.55902 | 4.44E-05    |
| 33904 | WSB2         | 2.55865 | 5.08E-04    |
| 9757  | HS.369017    | 2.55838 | 4.25E-05    |
| 18920 | LOC644250    | 2.55607 | 0.000475214 |
| 27311 | PDCD4        | 2.55148 | 0.000139052 |
| 7562  | FZD1         | 2.54808 | 2.48E-06    |
| 13191 | KIAA1688     | 2.54643 | 9.31E-05    |
| 4292  | CNTN2        | 2.53802 | 2.29E-04    |
| 32474 | TMEM200A     | 2.53495 | 4.93E-07    |
| 6635  | FAM89B       | 2.5341  | 1.64E-05    |
| 23500 | LOC730990    | 2.53197 | 3.94E-05    |
| 1375  | ATP9A        | 2.52973 | 1.09E-04    |
| 8126  | GPR137C      | 2.52944 | 0.000217768 |
| 19248 | LOC644936    | 2.52867 | 4.31E-04    |
| 4916  | CYTH2        | 2.5213  | 6.31E-06    |
| 20654 | LOC648921    | 2.51994 | 1.76E-03    |
| 2445  | C1ORF71      | 2.50491 | 9.78E-04    |

|       |              |         |             |
|-------|--------------|---------|-------------|
| 21820 | LOC652726    | 2.49851 | 5.58E-05    |
| 16100 | LOC100134868 | 2.49288 | 0.00076351  |
| 27105 | PAPSS2       | 2.49026 | 0.000148906 |
| 32246 | TIMP2        | 2.48501 | 3.26E-05    |
| 27648 | PIP5K2B      | 2.48028 | 0.000236563 |
| 12214 | HSBP1        | 2.47723 | 1.82E-04    |
| 32754 | TP53INP2     | 2.47324 | 2.42E-05    |
| 29037 | REM2         | 2.46751 | 0.000170127 |
| 34742 | ZNF84        | 2.46625 | 2.39E-04    |
| 3872  | CENTA1       | 2.46106 | 3.74E-04    |
| 23918 | LY6H         | 2.45793 | 0.000317539 |
| 29595 | RSBN1        | 2.45785 | 8.01E-04    |
| 1733  | BRP44L       | 2.45488 | 5.07E-04    |
| 2751  | C3ORF70      | 2.45314 | 1.92E-06    |
| 12862 | JUN          | 2.4481  | 4.37E-04    |
| 15357 | LOC100132727 | 2.44481 | 0.00058635  |
| 13224 | KIDINS220    | 2.43944 | 0.00068445  |
| 33183 | TUBB4Q       | 2.43584 | 0.00171503  |
| 685   | ALPP         | 2.43222 | 3.60E-05    |
| 14002 | LOC100128274 | 2.43042 | 1.90E-04    |
| 20699 | LOC649095    | 2.42655 | 0.00040167  |
| 7123  | FLJ35390     | 2.39837 | 0.00162187  |
| 16740 | LOC387856    | 2.39594 | 8.21E-04    |
| 7033  | FLJ22184     | 2.3897  | 4.07E-04    |
| 20602 | LOC648740    | 2.38616 | 8.38E-06    |
| 10392 | HS.538962    | 2.38583 | 0.000324449 |
| 31615 | STOX2        | 2.38135 | 4.42E-04    |
| 23592 | LOC731895    | 2.3779  | 0.000838915 |
| 32863 | TRIM2        | 2.37536 | 5.63E-04    |
| 30075 | SERTAD4      | 2.36897 | 0.000363024 |
| 26135 | NOL4         | 2.36463 | 0.000261492 |
| 27620 | PIK3R1       | 2.35977 | 1.01E-07    |
| 27073 | PAK3         | 2.34949 | 1.62E-04    |
| 27855 | PMP22        | 2.34705 | 7.89E-06    |
| 27636 | PINK1        | 2.34687 | 1.17E-05    |
| 3223  | CAMSAP1      | 2.34021 | 1.96E-04    |



|       |              |         |             |
|-------|--------------|---------|-------------|
| 9323  | HS.168950    | 2.33738 | 1.84E-04    |
| 17248 | LOC401115    | 2.33367 | 0.000151535 |
| 6270  | F3           | 2.32945 | 2.00E-08    |
| 2256  | C18ORF32     | 2.32914 | 4.41E-04    |
| 777   | ANKRD10      | 2.32837 | 2.48E-04    |
| 5372  | DMRTA2       | 2.32784 | 5.27E-06    |
| 6347  | FAM117B      | 2.32504 | 9.42E-04    |
| 731   | AMY1A        | 2.3232  | 0.000158787 |
| 7610  | GABRR1       | 2.31983 | 8.23E-08    |
| 1520  | BAZ2B        | 2.30948 | 5.18E-04    |
| 7920  | GLRA2        | 2.30858 | 6.83E-05    |
| 10190 | HS.522924    | 2.30739 | 1.62E-03    |
| 7762  | GDAP1        | 2.30342 | 6.22E-05    |
| 31325 | SPHK2        | 2.29983 | 1.68E-04    |
| 31499 | ST18         | 2.2969  | 9.74E-04    |
| 15124 | LOC100131989 | 2.29335 | 1.57E-04    |
| 23665 | LOC88523     | 2.29171 | 0.000476299 |
| 30325 | SKP1         | 2.28675 | 1.76E-04    |
| 2743  | C3ORF58      | 2.28463 | 0.000119256 |
| 27566 | PHYHIPL      | 2.28388 | 1.72E-03    |
| 27332 | PDE4D        | 2.28016 | 3.70E-05    |
| 760   | ANK2         | 2.27803 | 3.84E-05    |
| 1101  | ARL3         | 2.26792 | 1.03E-03    |
| 25218 | MNX1         | 2.26631 | 4.41E-07    |
| 7255  | FLJ44048     | 2.26493 | 6.84E-06    |
| 30029 | SERINC1      | 2.26355 | 3.12E-04    |
| 34800 | ZSWIM6       | 2.2634  | 3.19E-04    |
| 13943 | LOC100128062 | 2.26302 | 0.000498795 |
| 18811 | LOC644033    | 2.2611  | 5.93E-04    |
| 20075 | LOC646996    | 2.25787 | 1.36E-04    |
| 7976  | GNAO1        | 2.25676 | 0.00121073  |
| 22799 | LOC728661    | 2.25642 | 0.000599836 |
| 979   | APPBP2       | 2.25324 | 6.41E-04    |
| 25716 | NAP1L3       | 2.24879 | 9.43E-04    |
| 14359 | LOC100129502 | 2.24469 | 1.52E-04    |
| 25580 | MYCBP2       | 2.24333 | 0.000445387 |

|       |           |         |             |
|-------|-----------|---------|-------------|
| 27083 | PAM       | 2.23671 | 0.00170991  |
| 22583 | LOC728105 | 2.2358  | 0.000601193 |
| 29747 | SARM1     | 2.2285  | 5.83E-07    |
| 7602  | GABRB3    | 2.22682 | 4.00E-04    |
| 30261 | SIAH3     | 2.22476 | 1.89E-05    |
| 27664 | PITX1     | 2.22382 | 0.00102378  |
| 19467 | LOC645452 | 2.21703 | 0.000168591 |
| 6533  | FAM46A    | 2.21591 | 1.24E-03    |
| 26308 | NT5C2     | 2.21285 | 0.00159191  |
| 1086  | ARID5B    | 2.21184 | 0.000139405 |
| 494   | AFF3      | 2.21139 | 1.28E-03    |
| 29124 | RGS16     | 2.21012 | 2.33E-05    |
| 10056 | HS.475334 | 2.20669 | 1.41E-03    |
| 3738  | CDH10     | 2.20522 | 0.000389319 |
| 9819  | HS.388347 | 2.2022  | 2.82E-05    |
| 34703 | ZNF786    | 2.20193 | 1.65E-03    |
| 8705  | HIST1H4J  | 2.19897 | 4.86E-06    |
| 9740  | HS.36053  | 2.19737 | 3.65E-05    |
| 651   | ALG13     | 2.19414 | 4.86E-05    |
| 33588 | VASH2     | 2.19373 | 0.000586609 |
| 28810 | RALGPS1   | 2.19311 | 0.000999046 |
| 5774  | EFNB3     | 2.191   | 0.000919096 |
| 1745  | BSCL2     | 2.18758 | 8.17E-04    |
| 29151 | RHBDL3    | 2.18758 | 4.86E-05    |
| 3740  | CDH12     | 2.18674 | 0.000112317 |
| 24064 | MAP1LC3B  | 2.18347 | 2.00E-04    |
| 32539 | TMEM59    | 2.17758 | 1.77E-03    |
| 33171 | TUBA3E    | 2.17556 | 2.58E-04    |
| 526   | AGPAT4    | 2.17042 | 1.95E-04    |
| 27832 | PLXNA1    | 2.16997 | 0.000477137 |
| 34219 | ZMPSTE24  | 2.16821 | 0.00130116  |
| 34669 | ZNF738    | 2.16494 | 0.00145642  |
| 28749 | RAB9B     | 2.16376 | 1.41E-03    |
| 3350  | CCBE1     | 2.16311 | 2.69E-04    |
| 5875  | ELAVL1    | 2.15865 | 6.37E-04    |
| 13154 | KIAA1370  | 2.15727 | 5.07E-05    |

|       |           |         |             |
|-------|-----------|---------|-------------|
| 9496  | HS.233165 | 2.15522 | 0.000536209 |
| 1356  | ATP6V1B2  | 2.15309 | 0.000839601 |
| 6457  | FAM181B   | 2.15303 | 6.91E-04    |
| 25137 | MKL2      | 2.14461 | 0.000214816 |
| 27876 | PNMA1     | 2.14384 | 0.000290225 |
| 23806 | LRRC37B2  | 2.14195 | 4.81E-04    |
| 6851  | FGD3      | 2.139   | 1.84E-04    |
| 1746  | BSDC1     | 2.13842 | 0.000430355 |
| 27997 | POTEF     | 2.13305 | 0.000655028 |
| 2969  | C7ORF55   | 2.12929 | 5.66E-05    |
| 29923 | SEC11C    | 2.12843 | 8.11E-04    |
| 31488 | SSX2IP    | 2.12215 | 5.19E-06    |
| 29277 | RNF128    | 2.12203 | 5.41E-06    |
| 30348 | SLC12A2   | 2.12048 | 0.000343525 |
| 8277  | GRK5      | 2.11347 | 0.000106085 |
| 8573  | HEPACAM2  | 2.11332 | 2.39E-09    |
| 1610  | BEXL1     | 2.10951 | 2.62E-04    |
| 4229  | CMIP      | 2.10246 | 0.000705627 |
| 30224 | SHANK2    | 2.10164 | 0.000611099 |
| 23763 | LRP1B     | 2.09999 | 4.76E-05    |
| 6724  | FBXL16    | 2.09975 | 8.65E-04    |
| 26092 | NLRP8     | 2.09701 | 0.00161834  |
| 17496 | LOC440704 | 2.09699 | 0.0015232   |
| 2543  | C20ORF56  | 2.09698 | 4.79E-07    |
| 32624 | TMX4      | 2.09279 | 8.41E-04    |
| 20006 | LOC646821 | 2.0917  | 5.47E-05    |
| 25809 | NCOA6     | 2.09025 | 1.61E-03    |
| 2811  | C5ORF28   | 2.08938 | 6.33E-04    |
| 3279  | CASD1     | 2.0821  | 6.10E-05    |
| 28256 | PRKAR1A   | 2.08207 | 0.00119569  |
| 6208  | EVI1      | 2.07806 | 4.85E-05    |
| 6920  | FJX1      | 2.07539 | 1.80E-03    |
| 31199 | SORBS2    | 2.07266 | 7.37E-05    |
| 3968  | CHD6      | 2.06939 | 4.92E-05    |
| 34605 | ZNF652    | 2.06441 | 0.00172675  |
| 4838  | CYCS      | 2.06436 | 1.39E-03    |

|       |           |          |             |
|-------|-----------|----------|-------------|
| 11686 | HS.572642 | 2.06121  | 0.000136646 |
| 34025 | ZADH2     | 2.05857  | 3.02E-05    |
| 17246 | LOC401098 | 2.05589  | 1.58E-03    |
| 27462 | PFN2      | 2.05533  | 1.58E-03    |
| 27137 | PARP6     | 2.05441  | 5.65E-04    |
| 5651  | DYNC1H1   | 2.04874  | 0.000834135 |
| 7587  | GABARAPL2 | 2.04534  | 0.00165234  |
| 149   | AASDHPPT  | 2.04017  | 7.58E-04    |
| 1970  | C12ORF51  | 2.038    | 0.000668525 |
| 31721 | SVOP      | 2.03603  | 7.00E-04    |
| 1389  | ATXN1     | 2.03408  | 3.27E-05    |
| 20667 | LOC648980 | 2.03345  | 0.00062575  |
| 24523 | MIB1      | 2.03159  | 3.22E-04    |
| 31982 | TCEAL3    | 2.03073  | 0.00151379  |
| 12229 | HSD17B7   | 2.03003  | 1.50E-03    |
| 27402 | PDZRN4    | 2.02983  | 2.33E-05    |
| 6395  | FAM13B    | 2.02944  | 3.18E-04    |
| 1349  | ATP6V0C   | 2.02572  | 1.08E-03    |
| 12828 | JAKMIP2   | 2.01869  | 8.10E-04    |
| 34227 | ZMYND11   | 2.01687  | 0.00171037  |
| 31603 | STMN1     | 2.00603  | 0.000940483 |
| 29145 | RHBDD2    | 2.00523  | 6.87E-04    |
| 25808 | NCOA5     | 2.00244  | 0.000102715 |
| 30330 | SLAIN1    | 2.00203  | 1.00E-03    |
| 2195  | C17ORF45  | -2.00166 | 0.00119767  |
| 23469 | LOC730746 | -2.00168 | 1.67E-03    |
| 30825 | SND1      | -2.00433 | 0.00128091  |
| 19456 | LOC645436 | -2.00559 | 1.69E-03    |
| 6242  | EXOSC7    | -2.00603 | 0.000798232 |
| 17727 | LOC442232 | -2.00726 | 7.96E-05    |
| 28062 | PPIH      | -2.00996 | 8.70E-04    |
| 23234 | LOC729779 | -2.01096 | 4.05E-04    |
| 33239 | TYK2      | -2.01275 | 0.000787726 |
| 27020 | P4HA2     | -2.01467 | 1.30E-03    |
| 4563  | CRTAP     | -2.01592 | 2.86E-06    |
| 29147 | RHBDF1    | -2.01731 | 9.21E-04    |

|       |              |          |             |
|-------|--------------|----------|-------------|
| 18367 | LOC643007    | -2.01867 | 0.000867101 |
| 2331  | C1ORF106     | -2.02039 | 2.06E-04    |
| 1332  | ATP5G2       | -2.02135 | 0.00169599  |
| 25354 | MRPL45       | -2.02158 | 0.00179523  |
| 11023 | HS.552799    | -2.02363 | 1.41E-04    |
| 17333 | LOC402112    | -2.02644 | 0.00178903  |
| 4341  | COL2A1       | -2.03118 | 0.00112645  |
| 14518 | LOC100130009 | -2.03222 | 1.54E-05    |
| 23928 | LYN          | -2.03236 | 0.000609191 |
| 20489 | LOC648294    | -2.0327  | 0.0004778   |
| 32244 | TIMM9        | -2.03469 | 0.0015035   |
| 29412 | RPA1         | -2.03493 | 1.70E-03    |
| 33756 | WDR12        | -2.03533 | 5.96E-04    |
| 25781 | NCAPD2       | -2.03535 | 0.00132141  |
| 19436 | LOC645385    | -2.03595 | 0.00151373  |
| 2095  | C14ORF93     | -2.04138 | 6.93E-06    |
| 33243 | TYRO3        | -2.04437 | 4.26E-04    |
| 13396 | KNTC1        | -2.04704 | 1.95E-05    |
| 19027 | LOC644464    | -2.051   | 0.000744833 |
| 1355  | ATP6V1B1     | -2.0528  | 0.000263628 |
| 32263 | TKT          | -2.05643 | 0.000380042 |
| 1039  | ARHGAP19     | -2.05734 | 6.74E-05    |
| 4923  | CYYR1        | -2.05748 | 1.68E-05    |
| 30076 | SESN1        | -2.05841 | 2.09E-04    |
| 5054  | DDX10        | -2.06089 | 0.000505    |
| 12782 | ITGB3BP      | -2.06492 | 6.73E-06    |
| 17492 | LOC440589    | -2.06666 | 4.64E-04    |
| 23246 | LOC729816    | -2.06873 | 0.000791801 |
| 24128 | MAPKAPK3     | -2.06933 | 0.00146997  |
| 12221 | HSD17B11     | -2.07106 | 2.25E-05    |
| 32916 | TRIM71       | -2.07489 | 2.28E-05    |
| 16186 | LOC136143    | -2.07533 | 4.81E-04    |
| 31614 | STOX1        | -2.07691 | 0.000191887 |
| 28717 | RAB38        | -2.07726 | 6.33E-04    |
| 21994 | LOC653156    | -2.07967 | 1.41E-03    |
| 29560 | RPSA         | -2.08096 | 0.000379606 |

|       |              |          |             |
|-------|--------------|----------|-------------|
| 17241 | LOC401074    | -2.08141 | 6.58E-08    |
| 8588  | HES1         | -2.08285 | 0.000819562 |
| 29494 | RPLP1        | -2.08688 | 1.30E-03    |
| 6884  | FGFR3        | -2.09082 | 5.89E-06    |
| 4977  | DBX1         | -2.09957 | 0.000222703 |
| 29544 | RPS5         | -2.10042 | 0.00138553  |
| 29213 | RIPK2        | -2.10641 | 0.000218454 |
| 14423 | LOC100129685 | -2.1066  | 1.19E-03    |
| 27816 | PLOD3        | -2.10673 | 0.000954258 |
| 8805  | HNRNPA1      | -2.10967 | 1.74E-05    |
| 6898  | FHL3         | -2.1127  | 5.26E-05    |
| 18250 | LOC642741    | -2.1147  | 1.02E-03    |
| 32523 | TMEM45A      | -2.1169  | 0.000464867 |
| 17691 | LOC441876    | -2.11785 | 1.02E-03    |
| 1488  | BAIAP2L1     | -2.11832 | 3.63E-05    |
| 4156  | CLEC2D       | -2.11902 | 0.000733653 |
| 6966  | FLJ10986     | -2.12606 | 0.000420546 |
| 14281 | LOC100129237 | -2.12997 | 4.96E-04    |
| 16802 | LOC388556    | -2.13532 | 6.52E-04    |
| 25385 | MRPS30       | -2.13565 | 3.28E-04    |
| 18023 | LOC642250    | -2.13595 | 0.00107704  |
| 31129 | SNRPA        | -2.13825 | 6.40E-04    |
| 3730  | CDCA5        | -2.14343 | 0.0016145   |
| 26121 | NOB1         | -2.14482 | 3.43E-06    |
| 3733  | CDCA8        | -2.14728 | 0.000158263 |
| 33839 | WDYHV1       | -2.14889 | 0.000901318 |
| 15213 | LOC100132299 | -2.14934 | 3.42E-05    |
| 23294 | LOC729964    | -2.14942 | 0.000145725 |
| 23388 | LOC730246    | -2.15222 | 5.52E-04    |
| 29474 | RPL36        | -2.15341 | 1.12E-03    |
| 20693 | LOC649076    | -2.15494 | 0.000533848 |
| 14136 | LOC100128771 | -2.15556 | 6.32E-05    |
| 29459 | RPL27        | -2.15569 | 8.13E-04    |
| 20894 | LOC649839    | -2.15637 | 0.000233819 |
| 5649  | DYM          | -2.15657 | 5.43E-04    |
| 6676  | FANCG        | -2.15913 | 2.75E-04    |

|       |              |          |             |
|-------|--------------|----------|-------------|
| 26223 | NPY          | -2.15981 | 4.99E-04    |
| 22700 | LOC728428    | -2.16464 | 0.00122727  |
| 27540 | PHGDH        | -2.17929 | 0.000926407 |
| 23875 | LSM4         | -2.18409 | 0.00036081  |
| 15295 | LOC100132528 | -2.18468 | 8.34E-04    |
| 14997 | LOC100131609 | -2.187   | 0.000875169 |
| 29442 | RPL14L       | -2.18734 | 4.55E-04    |
| 16653 | LOC343184    | -2.19197 | 6.17E-05    |
| 5697  | EBPL         | -2.19209 | 2.05E-05    |
| 2763  | C4ORF14      | -2.19304 | 0.00128088  |
| 4474  | CPNE8        | -2.19514 | 2.56E-04    |
| 17500 | LOC440737    | -2.19615 | 0.000989795 |
| 22974 | LOC729102    | -2.1963  | 0.000282713 |
| 21275 | LOC651149    | -2.19678 | 1.31E-03    |
| 17403 | LOC440055    | -2.19775 | 1.17E-03    |
| 29440 | RPL13L       | -2.19817 | 2.16E-05    |
| 27368 | PDK3         | -2.20067 | 3.05E-04    |
| 31760 | SYPL1        | -2.20452 | 0.000128778 |
| 14389 | LOC100129585 | -2.20627 | 8.87E-05    |
| 29490 | RPL8         | -2.20725 | 1.35E-04    |
| 15083 | LOC100131866 | -2.20753 | 2.67E-05    |
| 2915  | C6ORF48      | -2.20788 | 0.000428494 |
| 19976 | LOC646766    | -2.21365 | 0.00033802  |
| 28801 | RAI14        | -2.21753 | 0.000675636 |
| 18557 | LOC643433    | -2.21779 | 0.000542767 |
| 16862 | LOC389141    | -2.21829 | 0.000459763 |
| 5715  | ECT2         | -2.21838 | 1.41E-03    |
| 29558 | RPS8         | -2.22068 | 0.00161471  |
| 19556 | LOC645691    | -2.22442 | 0.00107987  |
| 16693 | LOC347544    | -2.22526 | 0.000534957 |
| 23972 | MAD2L1       | -2.22823 | 0.000457464 |
| 18286 | LOC642817    | -2.23024 | 0.00054939  |
| 31588 | STK24        | -2.23459 | 3.03E-04    |
| 31024 | SNORD25      | -2.236   | 5.13E-05    |
| 1282  | ATIC         | -2.24113 | 0.000182776 |
| 33110 | TTK          | -2.24337 | 4.48E-04    |

|       |           |          |             |
|-------|-----------|----------|-------------|
| 23352 | LOC730107 | -2.24665 | 0.000445574 |
| 8727  | HJURP     | -2.24769 | 2.63E-05    |
| 23237 | LOC729789 | -2.24864 | 3.21E-04    |
| 29503 | RPP40     | -2.25604 | 1.62E-04    |
| 17594 | LOC441246 | -2.25891 | 4.60E-04    |
| 17228 | LOC400963 | -2.26592 | 0.000542002 |
| 29521 | RPS18     | -2.26781 | 0.00151457  |
| 32392 | TMEM144   | -2.27099 | 5.66E-08    |
| 7652  | GALK1     | -2.27206 | 9.50E-04    |
| 27192 | PCDH18    | -2.27211 | 0.000113843 |
| 4297  | CNTNAP1   | -2.2794  | 2.43E-04    |
| 23041 | LOC729279 | -2.28142 | 5.88E-05    |
| 5840  | EIF3H     | -2.28165 | 0.000193064 |
| 8828  | HNRPC     | -2.28204 | 0.00128473  |
| 30493 | SLC27A3   | -2.29001 | 2.85E-04    |
| 5742  | EEF1D     | -2.29339 | 0.000126152 |
| 30601 | SLC44A1   | -2.29419 | 0.000172089 |
| 3866  | CENPN     | -2.2944  | 0.000143689 |
| 29449 | RPL22     | -2.29465 | 0.00105741  |
| 20804 | LOC649447 | -2.29999 | 0.000262246 |
| 28036 | PPAT      | -2.3009  | 0.000393145 |
| 25509 | MTP18     | -2.30185 | 3.55E-05    |
| 3538  | CCNA2     | -2.30784 | 0.000412267 |
| 33891 | WNT5A     | -2.3104  | 3.36E-04    |
| 28110 | PPP1R3C   | -2.31108 | 3.02E-06    |
| 1659  | BMP2      | -2.32278 | 2.31E-05    |
| 18725 | LOC643863 | -2.32406 | 1.02E-03    |
| 359   | ADA       | -2.3269  | 2.14E-05    |
| 13751 | LGMN      | -2.32715 | 4.54E-05    |
| 12250 | HSP90AB1  | -2.32781 | 1.49E-03    |
| 5850  | EIF4B     | -2.32818 | 1.13E-03    |
| 13724 | LEPREL1   | -2.32851 | 0.000169338 |
| 17534 | LOC440991 | -2.33062 | 1.54E-04    |
| 29559 | RPS9      | -2.33092 | 1.06E-04    |
| 3724  | CDC7      | -2.33576 | 0.000342965 |
| 27035 | PABPC4    | -2.33611 | 0.000164425 |



|       |              |          |             |
|-------|--------------|----------|-------------|
| 33241 | TYMS         | -2.34068 | 0.00106577  |
| 30229 | SHC1         | -2.34608 | 0.00105777  |
| 21754 | LOC652624    | -2.34734 | 2.21E-04    |
| 5846  | EIF3M        | -2.34987 | 0.00181367  |
| 15032 | LOC100131713 | -2.35114 | 0.000201749 |
| 29432 | RPL10A       | -2.35345 | 0.00131867  |
| 24235 | MCM6         | -2.35636 | 0.00108431  |
| 19046 | LOC644511    | -2.36244 | 0.000514797 |
| 5044  | DDIT4L       | -2.36718 | 0.000107365 |
| 545   | AHCY         | -2.3677  | 0.000431822 |
| 18592 | LOC643531    | -2.37199 | 1.01E-03    |
| 5744  | EEF1G        | -2.37611 | 0.000630065 |
| 5765  | EFHD1        | -2.38043 | 1.20E-03    |
| 32637 | TNFRSF10B    | -2.38066 | 1.53E-05    |
| 26099 | NME1-NME2    | -2.38426 | 4.44E-05    |
| 22757 | LOC728564    | -2.38494 | 3.69E-04    |
| 8826  | HNRPA1P4     | -2.38609 | 3.87E-05    |
| 17458 | LOC440359    | -2.38691 | 5.63E-04    |
| 28560 | PTPN13       | -2.39211 | 0.000413752 |
| 15180 | LOC100132199 | -2.39337 | 2.68E-05    |
| 4955  | DARS         | -2.39728 | 1.56E-03    |
| 1882  | C11ORF1      | -2.39828 | 2.51E-05    |
| 23282 | LOC729926    | -2.39973 | 7.65E-04    |
| 15041 | LOC100131735 | -2.40035 | 2.35E-05    |
| 22829 | LOC728732    | -2.40089 | 6.11E-05    |
| 3973  | CHEK1        | -2.40178 | 1.16E-06    |
| 600   | AKR1A1       | -2.40346 | 0.000695089 |
| 15586 | LOC100133372 | -2.40481 | 1.53E-04    |
| 31607 | STOM         | -2.40533 | 3.40E-07    |
| 22710 | LOC728453    | -2.40686 | 0.0001068   |
| 29457 | RPL26        | -2.4112  | 0.000285349 |
| 29921 | SEC11A       | -2.41182 | 0.00102718  |
| 16776 | LOC388275    | -2.41288 | 5.56E-06    |
| 29438 | RPL13A       | -2.41592 | 0.000922424 |
| 3795  | CDKN3        | -2.41856 | 0.000112421 |
| 30404 | SLC20A2      | -2.41879 | 6.23E-06    |

|       |              |          |             |
|-------|--------------|----------|-------------|
| 13757 | LGTN         | -2.42032 | 2.32E-05    |
| 32648 | TNFRSF19     | -2.42065 | 6.93E-05    |
| 31239 | SP5          | -2.42085 | 2.37E-09    |
| 23974 | MAD2L2       | -2.42585 | 0.000123115 |
| 12602 | IMPA2        | -2.42996 | 1.90E-06    |
| 17525 | LOC440927    | -2.43391 | 0.00119949  |
| 29414 | RPA3         | -2.43719 | 0.00177478  |
| 16156 | LOC127295    | -2.43999 | 5.06E-04    |
| 29565 | RPUSD3       | -2.44425 | 1.98E-07    |
| 16979 | LOC390578    | -2.44648 | 8.18E-08    |
| 15104 | LOC100131940 | -2.44655 | 2.19E-05    |
| 26103 | NME4         | -2.44757 | 0.00114224  |
| 8825  | HNRPA1L-2    | -2.45235 | 5.46E-04    |
| 1537  | BCAR3        | -2.45546 | 0.000368573 |
| 14206 | LOC100129028 | -2.45901 | 3.51E-04    |
| 16672 | LOC345041    | -2.46013 | 0.000101781 |
| 3125  | CA14         | -2.46417 | 0.000205741 |
| 32089 | TET1         | -2.46774 | 3.21E-05    |
| 12231 | HSD17B8      | -2.47022 | 0.000519001 |
| 4479  | CPS1         | -2.47967 | 2.21E-06    |
| 25464 | MTA3         | -2.48169 | 8.09E-05    |
| 5758  | EFEMP1       | -2.48833 | 1.42E-05    |
| 28160 | PQLC3        | -2.48845 | 0.000585543 |
| 30245 | SHMT2        | -2.48964 | 0.00117427  |
| 23103 | LOC729423    | -2.50041 | 6.49E-06    |
| 12741 | ISG20L1      | -2.50404 | 9.70E-05    |
| 29539 | RPS3         | -2.50954 | 0.000103446 |
| 22857 | LOC728791    | -2.5096  | 5.69E-06    |
| 23391 | LOC730255    | -2.50972 | 1.22E-03    |
| 24097 | MAP4K2       | -2.51767 | 5.17E-06    |
| 7686  | GAPDH        | -2.51826 | 0.00128279  |
| 2433  | C1ORF57      | -2.51861 | 1.49E-03    |
| 2262  | C18ORF56     | -2.51885 | 0.000156088 |
| 1792  | BUB1         | -2.52119 | 9.50E-06    |
| 5831  | EIF2S3       | -2.52373 | 3.38E-04    |
| 29039 | RENBP        | -2.53102 | 4.92E-07    |

|       |              |          |             |
|-------|--------------|----------|-------------|
| 29481 | RPL39L       | -2.53153 | 0.00013954  |
| 17141 | LOC399804    | -2.5389  | 3.38E-05    |
| 34552 | ZNF581       | -2.54051 | 9.37E-05    |
| 1156  | ARRDC4       | -2.54054 | 2.88E-05    |
| 8789  | HMMR         | -2.54277 | 8.17E-05    |
| 28953 | RBMX         | -2.5493  | 5.57E-05    |
| 32179 | THEM2        | -2.55298 | 5.30E-04    |
| 13239 | KIF20A       | -2.55316 | 1.13E-05    |
| 1403  | AURKA        | -2.55681 | 5.93E-05    |
| 27066 | PAICS        | -2.55763 | 0.00111653  |
| 5836  | EIF3D        | -2.56061 | 6.72E-05    |
| 13252 | KIF2C        | -2.56757 | 1.70E-06    |
| 14814 | LOC100130980 | -2.57639 | 4.33E-05    |
| 31821 | TAFID        | -2.57677 | 6.27E-06    |
| 27653 | PIR          | -2.58392 | 2.26E-06    |
| 7564  | FZD2         | -2.58518 | 0.000146094 |
| 28778 | RAD51AP1     | -2.59104 | 5.06E-06    |
| 14695 | LOC100130562 | -2.59563 | 3.41E-05    |
| 8547  | HEATR1       | -2.59617 | 5.95E-07    |
| 22591 | LOC728126    | -2.59998 | 3.37E-05    |
| 29483 | RPL4         | -2.62451 | 7.56E-05    |
| 25783 | NCAPG        | -2.62632 | 6.41E-05    |
| 20366 | LOC647856    | -2.6267  | 1.31E-05    |
| 29462 | RPL29        | -2.62809 | 4.36E-07    |
| 23274 | LOC729903    | -2.63121 | 4.28E-05    |
| 15975 | LOC100134393 | -2.6327  | 2.71E-04    |
| 9745  | HS.363526    | -2.6341  | 0.000643774 |
| 561   | AIF1L        | -2.63663 | 1.37E-04    |
| 8597  | HEXB         | -2.63709 | 1.51E-03    |
| 5993  | EPDR1        | -2.63912 | 0.00156376  |
| 7966  | GMPS         | -2.64155 | 1.99E-04    |
| 27563 | PHYH         | -2.64322 | 2.14E-05    |
| 4100  | CKS1B        | -2.64512 | 1.68E-04    |
| 7898  | GLDC         | -2.64809 | 0.00143371  |
| 5513  | DPH5         | -2.6481  | 2.11E-05    |
| 18914 | LOC644237    | -2.66097 | 0.0011589   |

|       |           |          |             |
|-------|-----------|----------|-------------|
| 4521  | CREG1     | -2.6618  | 6.73E-05    |
| 20185 | LOC647285 | -2.66563 | 1.82E-04    |
| 22536 | LOC727984 | -2.67684 | 0.000223687 |
| 8625  | HIBADH    | -2.68374 | 0.00144114  |
| 684   | ALPL      | -2.69266 | 2.39E-06    |
| 17636 | LOC441506 | -2.70546 | 6.10E-05    |
| 30602 | SLC44A2   | -2.70757 | 1.24E-03    |
| 16741 | LOC387867 | -2.71424 | 2.45E-05    |
| 23060 | LOC729340 | -2.7157  | 0.000999351 |
| 27743 | PLCD1     | -2.72    | 1.14E-07    |
| 22597 | LOC728139 | -2.72434 | 4.77E-05    |
| 28530 | PTGR1     | -2.72675 | 7.39E-05    |
| 5741  | EEF1B2    | -2.7289  | 4.84E-05    |
| 18360 | LOC642989 | -2.73236 | 0.000921883 |
| 20058 | LOC646942 | -2.74335 | 5.41E-05    |
| 16737 | LOC387825 | -2.74954 | 5.93E-06    |
| 16236 | LOC148430 | -2.76485 | 2.32E-05    |
| 29441 | RPL14     | -2.76505 | 4.49E-06    |
| 31176 | SNX5      | -2.77426 | 4.41E-08    |
| 13592 | LAMA1     | -2.77535 | 2.89E-07    |
| 16814 | LOC388707 | -2.77694 | 1.99E-06    |
| 29179 | RHPN2     | -2.78226 | 0.00110049  |
| 23133 | LOC729500 | -2.78295 | 8.63E-06    |
| 2524  | C20ORF199 | -2.79683 | 8.26E-05    |
| 27370 | PDLIM1    | -2.79852 | 0.000250318 |
| 27030 | PABPC1    | -2.7998  | 0.000107149 |
| 7486  | FRZB      | -2.81189 | 5.35E-04    |
| 17023 | LOC391075 | -2.82637 | 0.00139394  |
| 6705  | FBL       | -2.8276  | 2.59E-05    |
| 13708 | LEF1      | -2.83207 | 1.15E-05    |
| 4101  | CKS2      | -2.83376 | 0.000537912 |
| 13438 | KRT19     | -2.83803 | 2.34E-05    |
| 28410 | PSAT1     | -2.8451  | 8.29E-07    |
| 33979 | YAP1      | -2.84569 | 0.00106156  |
| 29435 | RPL12     | -2.85091 | 4.23E-05    |
| 22553 | LOC728031 | -2.85482 | 8.14E-05    |

|       |              |          |             |
|-------|--------------|----------|-------------|
| 29524 | RPS2         | -2.85918 | 1.32E-05    |
| 23861 | LRTM1        | -2.85972 | 1.48E-12    |
| 26404 | NUSAP1       | -2.86459 | 9.00E-05    |
| 20473 | LOC648249    | -2.86802 | 4.01E-06    |
| 23319 | LOC730029    | -2.87607 | 3.58E-05    |
| 24516 | MGST1        | -2.87812 | 2.82E-06    |
| 349   | ACVR1        | -2.88477 | 0.000447642 |
| 30500 | SLC29A1      | -2.91375 | 2.94E-06    |
| 17086 | LOC391833    | -2.91531 | 4.06E-05    |
| 20614 | LOC648771    | -2.91567 | 7.23E-05    |
| 27493 | PGM1         | -2.92082 | 0.000287518 |
| 30836 | SNHG6        | -2.92725 | 2.13E-05    |
| 20015 | LOC646849    | -2.95184 | 3.75E-05    |
| 16783 | LOC388339    | -2.95309 | 4.55E-05    |
| 3785  | CDKN1A       | -2.95807 | 0.000310093 |
| 29436 | RPL12P6      | -2.97114 | 2.40E-06    |
| 5258  | DIMT1L       | -2.97803 | 1.83E-06    |
| 15940 | LOC100134304 | -2.98223 | 4.08E-08    |
| 13733 | LGALS1       | -2.98473 | 0.00160731  |
| 27902 | PODXL        | -3.00627 | 2.35E-08    |
| 16630 | LOC341315    | -3.02065 | 1.10E-04    |
| 481   | ADSS         | -3.02244 | 4.06E-06    |
| 29557 | RPS7         | -3.06985 | 2.69E-06    |
| 1406  | AURKB        | -3.07612 | 5.67E-07    |
| 23373 | LOC730187    | -3.08276 | 4.32E-06    |
| 25214 | MND1         | -3.08698 | 3.39E-07    |
| 14412 | LOC100129657 | -3.08986 | 0.00120608  |
| 33282 | UBE2C        | -3.09218 | 4.69E-06    |
| 30114 | SFRP1        | -3.10477 | 0.000250519 |
| 17015 | LOC391019    | -3.10602 | 2.05E-05    |
| 28602 | PTTG1        | -3.11309 | 2.05E-05    |
| 17541 | LOC441013    | -3.11866 | 6.73E-07    |
| 20657 | LOC648931    | -3.12515 | 3.24E-09    |
| 31661 | SUCLG2       | -3.13505 | 5.75E-07    |
| 1559  | BCL2L12      | -3.13599 | 4.40E-07    |
| 32222 | TIGA1        | -3.13783 | 7.09E-05    |

|       |              |          |             |
|-------|--------------|----------|-------------|
| 7770  | GDF15        | -3.14204 | 1.42E-07    |
| 2878  | C6ORF160     | -3.15022 | 0.000111744 |
| 15382 | LOC100132795 | -3.21797 | 1.51E-05    |
| 4930  | DAB2         | -3.2203  | 2.91E-05    |
| 32933 | TRIP6        | -3.23132 | 1.32E-06    |
| 20091 | LOC647030    | -3.23731 | 4.86E-05    |
| 26048 | NKD1         | -3.24181 | 4.37E-06    |
| 6320  | FAM107A      | -3.24905 | 0.000449795 |
| 16552 | LOC286444    | -3.25137 | 6.05E-06    |
| 26390 | NUP37        | -3.26236 | 3.70E-05    |
| 19783 | LOC646294    | -3.28211 | 1.06E-06    |
| 2210  | C17ORF61     | -3.28907 | 2.68E-05    |
| 19553 | LOC645688    | -3.29172 | 3.95E-06    |
| 25847 | NCRNA00219   | -3.29327 | 7.23E-05    |
| 28663 | QPRT         | -3.29832 | 2.04E-05    |
| 31361 | SPON1        | -3.32269 | 5.27E-06    |
| 30835 | SNHG5        | -3.32459 | 0.000204237 |
| 4596  | CSDA         | -3.3629  | 0.000363294 |
| 455   | ADM          | -3.40482 | 4.11E-05    |
| 23228 | LOC729768    | -3.41997 | 2.20E-05    |
| 1753  | BST2         | -3.42742 | 1.17E-07    |
| 20685 | LOC649049    | -3.46913 | 1.63E-06    |
| 17292 | LOC401537    | -3.50501 | 3.79E-07    |
| 6707  | FBLN1        | -3.53279 | 3.88E-06    |
| 28241 | PRIM1        | -3.53892 | 1.17E-06    |
| 8754  | HLA-E        | -3.54293 | 2.03E-07    |
| 643   | ALDOA        | -3.55096 | 0.000184641 |
| 14422 | LOC100129681 | -3.55393 | 9.42E-07    |
| 8773  | HMGB2        | -3.56419 | 9.08E-05    |
| 32964 | TRPM4        | -3.5945  | 2.41E-06    |
| 12398 | IFITM2       | -3.59918 | 1.38E-03    |
| 32177 | THBS4        | -3.6116  | 6.59E-07    |
| 3540  | CCNB1IP1     | -3.62989 | 3.35E-08    |
| 5477  | DOCK10       | -3.64495 | 7.09E-07    |
| 28387 | PRSS23       | -3.67253 | 0.000258012 |
| 26369 | NUDT7        | -3.67565 | 7.62E-05    |

|       |              |          |             |
|-------|--------------|----------|-------------|
| 26207 | NPM3         | -3.69114 | 1.35E-06    |
| 23887 | LTA4H        | -3.69913 | 6.82E-05    |
| 12399 | IFITM3       | -3.70541 | 0.000779898 |
| 8769  | HMGA1        | -3.72752 | 3.30E-08    |
| 323   | ACTA2        | -3.74071 | 1.75E-04    |
| 1530  | BBS9         | -3.7636  | 3.82E-07    |
| 7501  | FSTL1        | -3.80754 | 0.000136961 |
| 27805 | PLIN2        | -3.82123 | 4.77E-10    |
| 28975 | RBPMS2       | -3.82727 | 3.95E-06    |
| 23218 | LOC729742    | -3.84552 | 7.82E-07    |
| 13597 | LAMB1        | -3.85107 | 1.24E-07    |
| 6291  | FABP7        | -3.85422 | 0.000335025 |
| 12606 | IMPDH2       | -3.85952 | 4.79E-06    |
| 13834 | LITAF        | -3.86    | 4.66E-05    |
| 3953  | CHCHD10      | -3.91295 | 4.20E-06    |
| 2439  | C1ORF64      | -3.9544  | 5.48E-10    |
| 8473  | HAUS4        | -3.96227 | 4.95E-12    |
| 925   | APCDD1       | -3.97854 | 6.09E-08    |
| 5952  | ENO3         | -4.00663 | 6.90E-09    |
| 27019 | P4HA1        | -4.01147 | 0.00032695  |
| 4724  | CTSL2        | -4.01208 | 1.47E-06    |
| 19348 | LOC645173    | -4.02454 | 2.71E-06    |
| 28605 | PTTG3P       | -4.02805 | 3.37E-06    |
| 4239  | CMTM7        | -4.08386 | 7.09E-09    |
| 8089  | GPI          | -4.08821 | 1.18E-05    |
| 1616  | BGN          | -4.11601 | 0.000348095 |
| 23196 | LOC729679    | -4.2525  | 4.55E-08    |
| 3694  | CDC20        | -4.28351 | 3.38E-06    |
| 32729 | TOP2A        | -4.29945 | 1.43E-06    |
| 30828 | SNHG1        | -4.38641 | 2.77E-06    |
| 3243  | CAPN6        | -4.44794 | 4.50E-07    |
| 30284 | SILV         | -4.59486 | 1.80E-07    |
| 15342 | LOC100132673 | -4.69254 | 2.18E-07    |
| 29716 | SALL4        | -4.95909 | 2.66E-08    |
| 3541  | CCNB2        | -5.23718 | 4.33E-08    |
| 30511 | SLC2A3       | -5.39887 | 5.64E-07    |

|       |         |          |             |
|-------|---------|----------|-------------|
| 13691 | LDHA    | -5.76362 | 0.000569306 |
| 7500  | FST     | -5.82949 | 8.74E-09    |
| 1543  | BCAT1   | -6.13131 | 3.52E-06    |
| 5323  | DKK1    | -6.17493 | 4.94E-08    |
| 4343  | COL4A1  | -6.21986 | 6.18E-07    |
| 8078  | GPC3    | -6.35513 | 0.000466041 |
| 4333  | COL22A1 | -6.371   | 1.87E-08    |
| 32774 | TPM2    | -6.8139  | 1.85E-08    |
| 2430  | C1ORF54 | -7.81915 | 1.70E-07    |
| 965   | APOE    | -9.10671 | 6.03E-07    |
| 13804 | LIN28   | -26.8821 | 1.20E-13    |

**Supplementary Table 3:** Gene expression array data of significantly up-regulated and down-regulated genes at differentiation day 25 over day 13 in SHH/FGF8/Chir treated Floor-plate based population.



### Supplementary Table 4

| Column # | Column ID | Fold-Change | p-value     |
|----------|-----------|-------------|-------------|
| 32126    | TFF3      | 25.0585     | 2.47E-14    |
| 1209     | ASCL1     | 14.9328     | 1.97E-07    |
| 7395     | FOXA1     | 12.9897     | 4.15E-14    |
| 29133    | RGS4      | 11.0181     | 6.65E-09    |
| 27988    | POSTN     | 8.20403     | 2.16E-10    |
| 7396     | FOXA2     | 7.98132     | 1.60E-14    |
| 4342     | COL3A1    | 7.58625     | 2.49E-05    |
| 12731    | IRX3      | 7.42399     | 1.64E-06    |
| 9374     | HS.19193  | 7.27196     | 7.36E-09    |
| 3978     | CHGA      | 7.14305     | 2.77E-08    |
| 2470     | C1QL1     | 7.1366      | 1.38E-09    |
| 30390    | SLC18A1   | 7.04751     | 3.52E-14    |
| 22823    | LOC728715 | 6.5801      | 8.79E-09    |
| 12456    | IGFBP5    | 6.15962     | 3.65E-05    |
| 27665    | PITX2     | 6.10679     | 6.79E-14    |
| 12655    | INSM2     | 5.18438     | 1.70E-09    |
| 12944    | KCNJ16    | 4.98753     | 8.89E-13    |
| 436      | ADCYAP1   | 4.94597     | 2.43E-09    |
| 31361    | SPON1     | 4.93795     | 4.69E-08    |
| 13857    | LMO3      | 4.83578     | 7.25E-08    |
| 13865    | LMX1A     | 4.63407     | 1.51E-06    |
| 2543     | C20ORF56  | 4.4431      | 3.63E-13    |
| 12733    | IRX5      | 4.2929      | 1.45E-06    |
| 7988     | GNB3      | 4.13634     | 1.52E-10    |
| 32159    | TH        | 4.08743     | 0.000370318 |
| 5346     | DLK1      | 4.02203     | 1.73E-05    |
| 31775    | SYT4      | 4.00669     | 0.000372793 |
| 9428     | HS.204481 | 3.88697     | 6.71E-09    |
| 6197     | ETS2      | 3.70155     | 3.07E-09    |
| 5036     | DDC       | 3.61254     | 0.000194062 |
| 26250    | NR4A2     | 3.55879     | 9.29E-10    |
| 2867     | C6ORF141  | 3.48146     | 6.97E-09    |
| 26928    | OSBPL10   | 3.27941     | 3.81E-07    |

|       |           |          |             |
|-------|-----------|----------|-------------|
| 5372  | DMRTA2    | 3.26437  | 1.81E-08    |
| 33930 | XBP1      | 3.2414   | 0.000921089 |
| 27664 | PITX1     | 3.23009  | 1.10E-05    |
| 9819  | HS.388347 | 3.14523  | 8.26E-08    |
| 30239 | SHISA2    | 3.13411  | 4.23E-05    |
| 2743  | C3ORF58   | 3.10109  | 1.50E-06    |
| 623   | ALCAM     | 3.00487  | 0.000307411 |
| 6533  | FAM46A    | 2.99243  | 3.45E-05    |
| 28590 | PTPRO     | 2.94164  | 4.45E-05    |
| 18750 | LOC643911 | 2.93448  | 1.14E-06    |
| 31669 | SULF2     | 2.92397  | 8.02E-05    |
| 5348  | DLL1      | 2.92274  | 8.36E-05    |
| 30066 | SERPINF1  | 2.76873  | 0.000156193 |
| 5349  | DLL3      | 2.75425  | 0.000173675 |
| 3186  | CALCA     | 2.71125  | 2.10E-07    |
| 30590 | SLC39A8   | 2.67444  | 2.25E-05    |
| 32000 | TCF12     | 2.66777  | 1.46E-06    |
| 3941  | CGNL1     | 2.63848  | 0.00120585  |
| 32769 | TPH1      | 2.62647  | 1.95E-06    |
| 25941 | NENF      | 2.55992  | 0.000599552 |
| 29509 | RPRM      | 2.53138  | 0.00135525  |
| 32144 | TGFBR3    | 2.46754  | 8.27E-07    |
| 13689 | LDB2      | 2.40983  | 2.56E-05    |
| 2850  | C6ORF117  | 2.4009   | 0.000508473 |
| 31806 | TACSTD1   | 2.38661  | 0.00154495  |
| 24375 | MFNG      | 2.31488  | 5.04E-05    |
| 5424  | DNAJC19   | 2.30405  | 4.42E-07    |
| 12986 | KCNS3     | 2.28802  | 0.000136062 |
| 27855 | PMP22     | 2.27371  | 1.36E-05    |
| 4003  | CHN2      | 2.26467  | 0.000550787 |
| 5691  | EBF3      | 2.26453  | 0.000571924 |
| 3187  | CALCB     | 2.11359  | 2.49E-06    |
| 28325 | PROX1     | 2.08192  | 0.000135872 |
| 25218 | MNX1      | 2.05528  | 3.37E-06    |
| 6270  | F3        | 2.01261  | 5.71E-07    |
| 2245  | C18ORF10  | -2.00297 | 0.00129421  |

|       |              |          |             |
|-------|--------------|----------|-------------|
| 28546 | PTN          | -2.003   | 0.000354472 |
| 5920  | EMID2        | -2.00456 | 1.77E-05    |
| 24405 | MGC11082     | -2.00498 | 2.75E-05    |
| 5949  | ENKUR        | -2.00742 | 0.000107398 |
| 26398 | NUP93        | -2.01111 | 0.00124009  |
| 10837 | HS.545615    | -2.01378 | 2.65E-05    |
| 12688 | IQCC         | -2.01383 | 0.00019749  |
| 6196  | ETS1         | -2.01751 | 0.000848186 |
| 27290 | PCSK5        | -2.02079 | 0.00122771  |
| 16112 | LOC100192378 | -2.0216  | 4.35E-05    |
| 19806 | LOC646345    | -2.02311 | 0.000183202 |
| 23846 | LRRIQ1       | -2.02718 | 0.000541683 |
| 27746 | PLCE1        | -2.02761 | 0.000217281 |
| 2727  | C3ORF39      | -2.03023 | 0.000131521 |
| 26072 | NLGN3        | -2.03154 | 2.45E-05    |
| 2770  | C4ORF22      | -2.03489 | 0.00113778  |
| 3491  | CCDC88C      | -2.03515 | 0.00112864  |
| 25751 | NAV3         | -2.03716 | 8.63E-05    |
| 30413 | SLC22A17     | -2.03749 | 0.000703407 |
| 13014 | KDELC2       | -2.04133 | 0.00147391  |
| 27749 | PLCH1        | -2.0426  | 0.000234672 |
| 16489 | LOC284988    | -2.04353 | 0.000785305 |
| 9938  | HS.440518    | -2.04573 | 0.000285223 |
| 28076 | PPM1H        | -2.04637 | 0.00038276  |
| 429   | ADCY3        | -2.05728 | 0.000712376 |
| 31199 | SORBS2       | -2.05812 | 8.31E-05    |
| 17624 | LOC441453    | -2.0676  | 3.05E-06    |
| 13793 | LIM2         | -2.07092 | 0.00040641  |
| 33165 | TUB          | -2.07384 | 0.000187156 |
| 3462  | CCDC65       | -2.07613 | 0.00151516  |
| 4305  | COBL         | -2.07819 | 0.000485834 |
| 6912  | FILIP1       | -2.07924 | 9.69E-05    |
| 5195  | DGCR6        | -2.07943 | 0.000935686 |
| 33905 | WSCD1        | -2.08212 | 0.00033792  |
| 12933 | KCNIP1       | -2.08721 | 3.72E-05    |
| 4933  | DACH2        | -2.09051 | 9.24E-05    |

|       |              |          |             |
|-------|--------------|----------|-------------|
| 25960 | NEUROG2      | -2.09361 | 0.00111856  |
| 25930 | NEK2         | -2.09683 | 0.00144313  |
| 3288  | CASP3        | -2.09925 | 0.000130992 |
| 12971 | KCNMB4       | -2.09934 | 0.00140267  |
| 3125  | CA14         | -2.10277 | 0.00147559  |
| 17153 | LOC399959    | -2.10829 | 0.000816932 |
| 15855 | LOC100134073 | -2.10866 | 0.000366572 |
| 26322 | NTM          | -2.10973 | 0.000159062 |
| 7595  | GABRA2       | -2.11173 | 0.00169771  |
| 5618  | DUSP18       | -2.11289 | 8.90E-05    |
| 4289  | CNTFR        | -2.11375 | 0.00132713  |
| 3760  | CDH8         | -2.11381 | 7.41E-05    |
| 3196  | CALM1        | -2.11418 | 0.00157715  |
| 13615 | LARGE        | -2.11685 | 2.37E-05    |
| 32933 | TRIP6        | -2.11829 | 0.00047459  |
| 2242  | C17ORF97     | -2.12666 | 0.000851745 |
| 5478  | DOCK11       | -2.12763 | 0.000306132 |
| 7377  | FNDC4        | -2.13338 | 0.000482465 |
| 29672 | RYR3         | -2.13573 | 0.000392208 |
| 30669 | SLC7A6       | -2.13865 | 0.000299041 |
| 29816 | SCD5         | -2.14266 | 9.40E-05    |
| 12212 | HS6ST2       | -2.14751 | 0.00020473  |
| 4213  | CLSTN2       | -2.15117 | 2.14E-05    |
| 16924 | LOC389816    | -2.15626 | 4.60E-09    |
| 2102  | C15ORF26     | -2.15663 | 0.000242005 |
| 1103  | ARL4C        | -2.16184 | 0.00049625  |
| 31151 | SNX10        | -2.16614 | 0.000623725 |
| 16382 | LOC255783    | -2.17123 | 0.000592438 |
| 30372 | SLC16A14     | -2.17701 | 0.000382805 |
| 13177 | KIAA1598     | -2.1779  | 0.000634174 |
| 28587 | PTPRM        | -2.17848 | 0.000334455 |
| 8661  | HIST1H2AC    | -2.18157 | 0.00018782  |
| 30015 | SEPT6        | -2.18483 | 0.00101243  |
| 6572  | FAM65B       | -2.18593 | 1.46E-05    |
| 4614  | CSMD2        | -2.18777 | 0.000579739 |
| 19737 | LOC646168    | -2.18864 | 0.000417767 |

|       |           |          |             |
|-------|-----------|----------|-------------|
| 2429  | C1ORF53   | -2.19182 | 0.0017844   |
| 17855 | LOC641785 | -2.19315 | 0.000255891 |
| 5570  | DSCR6     | -2.20122 | 0.00137487  |
| 13835 | LIX1      | -2.20141 | 6.32E-06    |
| 23979 | MAF       | -2.20457 | 6.38E-05    |
| 4734  | CTXN1     | -2.21039 | 0.0007813   |
| 2049  | C14ORF159 | -2.2127  | 0.000171696 |
| 30388 | SLC17A8   | -2.21639 | 0.000916084 |
| 26228 | NQO1      | -2.21974 | 0.000753734 |
| 23817 | LRRC46    | -2.22159 | 0.000756129 |
| 32380 | TMEM132D  | -2.22662 | 0.000463067 |
| 2705  | C3ORF15   | -2.2299  | 0.000615847 |
| 27781 | PLEKHG1   | -2.23885 | 1.49E-05    |
| 29607 | RSPH9     | -2.24091 | 0.000109859 |
| 23965 | MAB21L1   | -2.24222 | 2.00E-05    |
| 25942 | NEO1      | -2.24511 | 2.27E-05    |
| 34157 | ZFP106    | -2.24688 | 0.00129693  |
| 33083 | TTC29     | -2.24927 | 0.000317648 |
| 3415  | CCDC19    | -2.25412 | 0.000638581 |
| 30209 | SH3GL2    | -2.2573  | 0.00175354  |
| 839   | ANKS1B    | -2.25784 | 6.46E-05    |
| 3472  | CCDC74A   | -2.25911 | 3.66E-05    |
| 27561 | PHTF1     | -2.26039 | 0.00113655  |
| 26505 | OPCML     | -2.26062 | 2.34E-05    |
| 23859 | LRRTM4    | -2.26387 | 0.00050229  |
| 27040 | PACRG     | -2.26701 | 8.08E-05    |
| 24318 | MELK      | -2.27019 | 0.000423662 |
| 10017 | HS.452398 | -2.27201 | 0.000477927 |
| 9237  | HS.147562 | -2.27279 | 0.000798954 |
| 26976 | OTX1      | -2.27327 | 0.000877908 |
| 8046  | GOLSYN    | -2.27724 | 0.000100581 |
| 1074  | ARHGEF6   | -2.27982 | 0.000748746 |
| 4639  | CSRNP3    | -2.28361 | 0.000213299 |
| 27547 | PHLDA1    | -2.28667 | 2.70E-05    |
| 3537  | CCNA1     | -2.28864 | 6.92E-05    |
| 26071 | NLGN2     | -2.29131 | 0.000215422 |

|       |           |          |             |
|-------|-----------|----------|-------------|
| 5325  | DKK3      | -2.29195 | 0.000372444 |
| 6326  | FAM108C1  | -2.29624 | 0.000567659 |
| 28721 | RAB3B     | -2.30577 | 0.000211905 |
| 2372  | C1ORF158  | -2.3174  | 0.00184147  |
| 32499 | TMEM231   | -2.32173 | 0.000378145 |
| 5550  | DRD1IP    | -2.3265  | 0.00129147  |
| 12785 | ITGB5     | -2.32837 | 0.00143999  |
| 30937 | SNORA79   | -2.32935 | 0.000394221 |
| 2538  | C20ORF46  | -2.34101 | 0.000827542 |
| 5939  | EMX2OS    | -2.34991 | 1.28E-05    |
| 3153  | CACNA1E   | -2.35127 | 0.000755994 |
| 28906 | RBKS      | -2.35486 | 1.25E-05    |
| 3806  | CDRT4     | -2.36622 | 0.000173226 |
| 32129 | TFPI      | -2.36876 | 0.000644776 |
| 5763  | EFHC1     | -2.36977 | 0.00112503  |
| 3746  | CDH18     | -2.37821 | 6.60E-06    |
| 33006 | TSHZ3     | -2.38415 | 0.00160322  |
| 6901  | FHOD3     | -2.38572 | 0.00106294  |
| 13805 | LIN28B    | -2.38688 | 0.000393414 |
| 1806  | C10ORF107 | -2.39735 | 0.000750154 |
| 32034 | TCTEX1D1  | -2.40988 | 0.00160003  |
| 31146 | SNTN      | -2.42893 | 0.000945171 |
| 30057 | SERPINB6  | -2.43305 | 1.01E-05    |
| 28580 | PTPRD     | -2.43513 | 6.24E-05    |
| 28210 | PRDM8     | -2.44594 | 0.000113613 |
| 2614  | C22ORF15  | -2.45467 | 0.000112958 |
| 12892 | KBTBD9    | -2.45472 | 2.16E-06    |
| 6246  | EXT1      | -2.4653  | 0.000117948 |
| 25946 | NETO2     | -2.46601 | 0.000568595 |
| 493   | AFF2      | -2.4707  | 0.0012124   |
| 31610 | STOML3    | -2.48765 | 0.000560404 |
| 31577 | STIL      | -2.49103 | 0.000199457 |
| 4826  | CYB5D1    | -2.49147 | 0.000128822 |
| 2078  | C14ORF45  | -2.49501 | 0.000787004 |
| 33501 | USP13     | -2.49771 | 6.06E-05    |
| 34226 | ZMYND10   | -2.50015 | 0.000105158 |

|       |               |          |             |
|-------|---------------|----------|-------------|
| 28507 | PTCHD1        | -2.50016 | 0.00120417  |
| 5322  | DKFZP781N1041 | -2.50483 | 0.000661286 |
| 3253  | CAPSL         | -2.50626 | 0.000844682 |
| 14289 | LOC100129268  | -2.508   | 0.000176359 |
| 17551 | LOC441054     | -2.5088  | 0.00166136  |
| 26395 | NUP62CL       | -2.51081 | 0.000373281 |
| 1776  | BTG3          | -2.51582 | 0.00131261  |
| 33005 | TSHZ2         | -2.51649 | 3.77E-05    |
| 4705  | CTNND2        | -2.52798 | 0.00038507  |
| 29792 | SCARNA11      | -2.53148 | 3.35E-06    |
| 4965  | DBC1          | -2.53221 | 0.000370596 |
| 32507 | TMEM31        | -2.53343 | 2.39E-06    |
| 1927  | C11ORF75      | -2.53649 | 0.000498243 |
| 6740  | FBXO15        | -2.54184 | 0.00139562  |
| 27370 | PDLIM1        | -2.54956 | 0.000681773 |
| 728   | AMPH          | -2.55801 | 6.39E-06    |
| 33718 | VWC2          | -2.56363 | 0.000340976 |
| 13724 | LEPREL1       | -2.56798 | 4.43E-05    |
| 1057  | ARHGDIB       | -2.573   | 5.20E-06    |
| 5765  | EFHD1         | -2.59294 | 0.000474204 |
| 3758  | CDH6          | -2.6075  | 0.000303268 |
| 7043  | FLJ23152      | -2.60944 | 0.000143522 |
| 31282 | SPATA17       | -2.61656 | 0.00020388  |
| 7106  | FLJ33590      | -2.61873 | 0.00025779  |
| 16264 | LOC151162     | -2.62005 | 0.000666466 |
| 32440 | TMEM178       | -2.62313 | 0.00011953  |
| 1987  | C12ORF69      | -2.62861 | 5.06E-06    |
| 2970  | C7ORF57       | -2.63494 | 0.000118643 |
| 23830 | LRRC6         | -2.63632 | 0.000197619 |
| 6173  | ESM1          | -2.63913 | 0.000368518 |
| 153   | ABAT          | -2.64114 | 3.81E-06    |
| 2793  | C4ORF47       | -2.64571 | 0.00134045  |
| 2301  | C19ORF51      | -2.64617 | 7.44E-05    |
| 34155 | ZFHX4         | -2.66127 | 5.12E-06    |
| 5762  | EFHB          | -2.66338 | 0.000148296 |
| 6920  | FJX1          | -2.66433 | 8.09E-05    |

|       |              |          |             |
|-------|--------------|----------|-------------|
| 12872 | KANK4        | -2.66744 | 0.000457332 |
| 26104 | NME5         | -2.66836 | 0.000118819 |
| 3148  | CACHD1       | -2.67846 | 0.000100474 |
| 25628 | MYO16        | -2.67972 | 8.67E-05    |
| 28838 | RAPGEF2      | -2.68049 | 7.06E-05    |
| 5553  | DRD4         | -2.68408 | 0.000500735 |
| 4087  | CITED2       | -2.68818 | 0.00192224  |
| 23790 | LRRC26       | -2.68889 | 2.44E-06    |
| 2631  | C22ORF42     | -2.69089 | 0.00039382  |
| 25564 | MXRA5        | -2.69302 | 0.00192861  |
| 12836 | JAZF1        | -2.70808 | 5.58E-05    |
| 13346 | KLHL29       | -2.71506 | 5.11E-06    |
| 25749 | NAV1         | -2.71696 | 0.000248061 |
| 29306 | RNF175       | -2.71799 | 3.04E-05    |
| 13815 | LINGO2       | -2.71868 | 2.30E-05    |
| 25208 | MMRN1        | -2.73481 | 0.000116097 |
| 3918  | CFDP1        | -2.73575 | 0.000150699 |
| 31242 | SP8          | -2.73862 | 5.04E-05    |
| 1311  | ATP1B3       | -2.7498  | 8.64E-05    |
| 25939 | NELL1        | -2.7509  | 0.00086776  |
| 32531 | TMEM51       | -2.77628 | 6.84E-06    |
| 15778 | LOC100133887 | -2.78135 | 1.17E-05    |
| 815   | ANKRD38      | -2.79552 | 0.000168264 |
| 33758 | WDR16        | -2.80194 | 0.000532777 |
| 12801 | ITM2C        | -2.81062 | 7.32E-05    |
| 32847 | TRH          | -2.84178 | 0.00148109  |
| 2881  | C6ORF165     | -2.84456 | 6.28E-05    |
| 15644 | LOC100133542 | -2.84572 | 9.65E-05    |
| 29811 | SCARNA8      | -2.84646 | 9.99E-06    |
| 33964 | XPR1         | -2.85352 | 5.49E-06    |
| 25940 | NELL2        | -2.86423 | 0.00024831  |
| 5455  | DNER         | -2.87832 | 0.00127284  |
| 33807 | WDR63        | -2.88707 | 4.43E-05    |
| 3038  | C9ORF116     | -2.89396 | 0.000215965 |
| 2553  | C20ORF85     | -2.89405 | 7.84E-05    |
| 5531  | DPY19L1      | -2.90287 | 0.000183171 |



|       |           |          |             |
|-------|-----------|----------|-------------|
| 31955 | TBR1      | -2.90815 | 7.60E-06    |
| 8655  | HIST1H1C  | -2.91043 | 9.46E-05    |
| 3401  | CCDC146   | -2.91057 | 0.000155147 |
| 31935 | TBC1D9    | -2.91662 | 6.93E-05    |
| 7421  | FOXJ1     | -2.94694 | 0.000577632 |
| 32783 | TPPP3     | -2.95648 | 0.000353912 |
| 5337  | DLG2      | -2.96987 | 1.13E-06    |
| 27810 | PLK4      | -2.98102 | 1.71E-06    |
| 24315 | MEIS2     | -3.03243 | 0.00109977  |
| 31243 | SPA17     | -3.03709 | 0.000523067 |
| 10979 | HS.551307 | -3.04712 | 1.13E-05    |
| 29794 | SCARNA13  | -3.05568 | 4.35E-05    |
| 32378 | TMEM132B  | -3.06408 | 1.54E-06    |
| 2690  | C2ORF77   | -3.07752 | 4.19E-05    |
| 27660 | PITPNM1   | -3.09871 | 2.62E-05    |
| 32963 | TRPM3     | -3.10437 | 0.000937085 |
| 3640  | CD36      | -3.10624 | 0.000121554 |
| 26070 | NLGN1     | -3.1408  | 9.93E-05    |
| 5749  | EFCAB1    | -3.15705 | 0.000423897 |
| 3121  | CA10      | -3.15947 | 0.000537722 |
| 3215  | CAMK2N1   | -3.16181 | 0.000561888 |
| 8016  | GNRH1     | -3.16554 | 1.25E-05    |
| 13037 | KHDRBS3   | -3.16572 | 0.000269437 |
| 5681  | E2F7      | -3.17981 | 2.36E-07    |
| 8174  | GPR37     | -3.18311 | 2.85E-05    |
| 29510 | RPRML     | -3.19177 | 0.000271322 |
| 4349  | COL4A6    | -3.1938  | 5.88E-05    |
| 27887 | PNOC      | -3.19863 | 4.88E-05    |
| 1543  | BCAT1     | -3.20615 | 0.000858798 |
| 28813 | RALYL     | -3.21662 | 0.000509498 |
| 30531 | SLC32A1   | -3.24737 | 0.0002618   |
| 25216 | MNS1      | -3.25707 | 0.000109366 |
| 3364  | CCDC109B  | -3.26787 | 0.000147649 |
| 4004  | CHODL     | -3.28962 | 0.00114785  |
| 965   | APOE      | -3.29237 | 0.00155578  |
| 5764  | EFHC2     | -3.29611 | 0.000143319 |

|       |           |          |             |
|-------|-----------|----------|-------------|
| 29002 | RDH10     | -3.30034 | 0.000369857 |
| 29600 | RSHL3     | -3.30753 | 6.17E-05    |
| 12317 | HTRA1     | -3.31522 | 0.000437969 |
| 2398  | C1ORF194  | -3.31829 | 1.21E-05    |
| 5895  | ELMOD1    | -3.32218 | 0.000142072 |
| 3066  | C9ORF171  | -3.33251 | 4.78E-05    |
| 33592 | VAT1L     | -3.3402  | 0.000247714 |
| 12399 | IFITM3    | -3.3542  | 0.0016376   |
| 28319 | PROM1     | -3.35504 | 5.84E-05    |
| 29034 | RELN      | -3.43956 | 1.30E-05    |
| 2397  | C1ORF192  | -3.45738 | 0.000124675 |
| 586   | AKAP14    | -3.46559 | 1.94E-05    |
| 5032  | DDAH1     | -3.46896 | 1.42E-05    |
| 3766  | CDK2AP2   | -3.4706  | 3.31E-06    |
| 3652  | CD47      | -3.47334 | 6.18E-05    |
| 4283  | CNR1      | -3.48521 | 9.70E-05    |
| 12694 | IQCG      | -3.4934  | 2.59E-05    |
| 10300 | HS.537002 | -3.49808 | 0.000142247 |
| 12506 | IL13RA2   | -3.50471 | 5.79E-05    |
| 28709 | RAB31     | -3.51372 | 7.79E-05    |
| 28536 | PTH2      | -3.54413 | 0.000188892 |
| 31283 | SPATA18   | -3.54742 | 5.71E-05    |
| 3071  | C9ORF24   | -3.55395 | 9.04E-05    |
| 7432  | FOXN4     | -3.57299 | 5.14E-09    |
| 27171 | PBX3      | -3.57487 | 0.000447274 |
| 32270 | TLE4      | -3.57637 | 7.16E-05    |
| 28981 | RCAN2     | -3.61105 | 0.000608261 |
| 32069 | TEKT1     | -3.61846 | 8.36E-05    |
| 17491 | LOC440585 | -3.62588 | 0.000175217 |
| 5660  | DYNLRB2   | -3.6297  | 6.28E-05    |
| 5938  | EMX2      | -3.66175 | 1.17E-06    |
| 24314 | MEIS1     | -3.68295 | 0.000402893 |
| 13856 | LMO2      | -3.74164 | 7.37E-06    |
| 6004  | EPHB1     | -3.77917 | 0.000119962 |
| 7504  | FSTL5     | -3.80048 | 0.000392914 |
| 1119  | ARMC3     | -3.82142 | 2.66E-05    |

|       |          |          |             |
|-------|----------|----------|-------------|
| 31257 | SPAG6    | -3.86214 | 1.74E-05    |
| 7865  | GJA1     | -3.88524 | 0.000511853 |
| 3274  | CASC1    | -3.88963 | 2.00E-05    |
| 7696  | GAS1     | -3.95396 | 2.45E-07    |
| 7805  | GFRA2    | -4.00209 | 0.000116201 |
| 3050  | C9ORF135 | -4.09611 | 3.21E-05    |
| 23853 | LRRN3    | -4.2728  | 1.34E-05    |
| 29603 | RSPH1    | -4.35627 | 1.08E-05    |
| 6458  | FAM183A  | -4.40302 | 2.73E-05    |
| 3220  | CAMKV    | -4.47543 | 4.97E-05    |
| 27284 | PCP4     | -4.64191 | 1.37E-05    |
| 29723 | SAMD3    | -4.7132  | 2.41E-06    |
| 31223 | SOX3     | -4.74012 | 8.45E-06    |
| 29396 | ROPNIL   | -4.86578 | 3.17E-06    |
| 29972 | SEMA3C   | -5.03965 | 4.16E-05    |
| 3695  | CDC20B   | -5.17405 | 5.72E-07    |
| 4298  | CNTNAP2  | -5.33902 | 4.01E-06    |
| 2006  | C13ORF30 | -5.4414  | 1.12E-06    |
| 33600 | VCAN     | -5.47499 | 0.000917643 |
| 1936  | C11ORF88 | -5.55748 | 2.96E-06    |
| 30115 | SFRP2    | -6.27713 | 3.81E-08    |
| 27159 | PAX6     | -6.64236 | 3.94E-10    |
| 866   | ANXA1    | -7.3691  | 4.96E-06    |
| 3561  | CCNO     | -9.3158  | 2.19E-08    |
| 13768 | LHX2     | -9.53566 | 3.56E-05    |

**Supplementary Table 4:** Gene expression array data of significantly up-regulated and down-regulated genes at differentiation day 25 in SHH/FGF8/Chir treated Floor-plate based population over control LSB treated population.

## **Supplementary Table 5**

| Column # | Column ID | Fold-Change | p-value  |
|----------|-----------|-------------|----------|
| 32126    | TFF3      | 24.0181     | 3.37E-14 |
| 1209     | ASCL1     | 22.1637     | 1.69E-08 |
| 9374     | HS.19193  | 14.7045     | 1.42E-11 |
| 7395     | FOXA1     | 13.8748     | 2.30E-14 |
| 13865    | LMX1A     | 10.953      | 4.33E-10 |
| 12456    | IGFBP5    | 9.56964     | 1.58E-06 |
| 4342     | COL3A1    | 9.49528     | 5.64E-06 |
| 12361    | ID3       | 9.45077     | 3.33E-08 |
| 27988    | POSTN     | 9.10453     | 7.82E-11 |
| 7396     | FOXA2     | 8.85174     | 5.07E-15 |
| 3941     | CGNL1     | 8.71553     | 1.37E-08 |
| 30390    | SLC18A1   | 8.37911     | 4.77E-15 |
| 5689     | EBF1      | 8.02385     | 2.37E-06 |
| 2470     | C1QL1     | 7.76325     | 5.90E-10 |
| 22823    | LOC728715 | 7.73246     | 1.77E-09 |
| 27665    | PITX2     | 7.32855     | 7.16E-15 |
| 12655    | INSM2     | 7.04572     | 4.97E-11 |
| 26250    | NR4A2     | 6.75415     | 1.28E-13 |
| 8156     | GPR177    | 6.28979     | 1.08E-05 |
| 13857    | LMO3      | 6.20624     | 4.64E-09 |
| 33930    | XBP1      | 5.8436      | 6.74E-06 |
| 12944    | KCNJ16    | 5.71955     | 1.37E-13 |
| 27821    | PLS3      | 5.62251     | 8.45E-07 |
| 5372     | DMRTA2    | 5.61111     | 8.09E-12 |
| 7988     | GNB3      | 5.55425     | 2.56E-12 |
| 31669    | SULF2     | 5.51821     | 6.78E-08 |
| 33128    | TTR       | 5.48234     | 2.88E-09 |
| 2543     | C20ORF56  | 5.42131     | 2.00E-14 |
| 32762    | TPBG      | 5.30583     | 7.23E-05 |
| 436      | ADCYAP1   | 5.20834     | 1.29E-09 |
| 26977    | OTX2      | 5.10526     | 6.89E-06 |
| 3978     | CHGA      | 5.07311     | 7.78E-07 |
| 32000    | TCF12     | 5.05883     | 1.27E-10 |

|       |           |         |             |
|-------|-----------|---------|-------------|
| 5348  | DLL1      | 4.72226 | 3.78E-07    |
| 4003  | CHN2      | 4.53859 | 9.76E-08    |
| 2867  | C6ORF141  | 4.43629 | 1.97E-10    |
| 32417 | TMEM163   | 4.40645 | 3.65E-08    |
| 26245 | NR2F2     | 4.38488 | 8.32E-05    |
| 5036  | DDC       | 4.37185 | 3.55E-05    |
| 6700  | FAT3      | 4.28732 | 4.74E-06    |
| 9428  | HS.204481 | 4.25031 | 1.93E-09    |
| 8288  | GRM8      | 4.16549 | 1.67E-06    |
| 28590 | PTPRO     | 4.13365 | 8.06E-07    |
| 32159 | TH        | 4.10876 | 0.000355952 |
| 31361 | SPON1     | 4.063   | 4.56E-07    |
| 34166 | ZFP36L1   | 4.05459 | 0.000219198 |
| 13689 | LDB2      | 3.9497  | 1.90E-08    |
| 32057 | TEAD2     | 3.94608 | 6.68E-06    |
| 12731 | IRX3      | 3.93674 | 0.000270763 |
| 28942 | RBM47     | 3.91109 | 0.000154758 |
| 30066 | SERPINF1  | 3.84276 | 3.72E-06    |
| 1666  | BMP7      | 3.83782 | 1.66E-05    |
| 25444 | MSX1      | 3.74709 | 3.45E-05    |
| 8593  | HES6      | 3.66092 | 5.43E-05    |
| 12149 | HS.7023   | 3.65165 | 0.000170814 |
| 30239 | SHISA2    | 3.60636 | 8.64E-06    |
| 9819  | HS.388347 | 3.52316 | 1.46E-08    |
| 7564  | FZD2      | 3.48734 | 3.69E-06    |
| 26928 | OSBPL10   | 3.44485 | 1.91E-07    |
| 27664 | PITX1     | 3.40016 | 5.92E-06    |
| 2743  | C3ORF58   | 3.31658 | 5.91E-07    |
| 30590 | SLC39A8   | 3.30002 | 1.28E-06    |
| 32144 | TGFBR3    | 3.28727 | 6.00E-09    |
| 18750 | LOC643911 | 3.2583  | 2.43E-07    |
| 17491 | LOC440585 | 3.24609 | 0.000469294 |
| 24375 | MFNG      | 3.24122 | 3.31E-07    |
| 5346  | DLK1      | 3.21349 | 0.000161289 |
| 7562  | FZD1      | 3.15302 | 8.07E-08    |
| 3186  | CALCA     | 3.14299 | 1.75E-08    |

|       |            |         |             |
|-------|------------|---------|-------------|
| 27772 | PLEKHA5    | 3.09727 | 0.000150905 |
| 26335 | NUAK1      | 3.08699 | 1.10E-05    |
| 34155 | ZFHX4      | 3.05463 | 6.49E-07    |
| 27855 | PMP22      | 3.03785 | 1.12E-07    |
| 4491  | CPVL       | 3.02972 | 0.000317992 |
| 7421  | FOXJ1      | 3.01784 | 0.000461499 |
| 2850  | C6ORF117   | 3.00725 | 3.47E-05    |
| 27105 | PAPSS2     | 2.97981 | 1.49E-05    |
| 12358 | ID1        | 2.94361 | 0.000160308 |
| 33004 | TSHZ1      | 2.93637 | 2.29E-07    |
| 5691  | EBF3       | 2.92465 | 2.26E-05    |
| 1086  | ARID5B     | 2.92012 | 2.33E-06    |
| 32769 | TPH1       | 2.88914 | 4.24E-07    |
| 5424  | DNAJC19    | 2.87234 | 6.43E-09    |
| 6208  | EVII       | 2.86069 | 2.04E-07    |
| 13858 | LMO4       | 2.85216 | 4.81E-05    |
| 12733 | IRX5       | 2.84963 | 0.000139911 |
| 5879  | ELF1       | 2.78573 | 1.43E-06    |
| 23752 | LRIG1      | 2.77491 | 0.000210665 |
| 23822 | LRRC4C     | 2.77041 | 5.37E-07    |
| 4780  | CXCR4      | 2.72468 | 5.12E-07    |
| 27696 | PKNOX2     | 2.7166  | 1.59E-05    |
| 31514 | ST6GALNAC5 | 2.70116 | 0.00012729  |
| 32854 | TRIL       | 2.66182 | 5.76E-06    |
| 7617  | GADD45G    | 2.62149 | 0.000385727 |
| 5349  | DLL3       | 2.62131 | 0.000304562 |
| 8399  | GULP1      | 2.58556 | 2.34E-07    |
| 16419 | LOC283514  | 2.55654 | 7.18E-05    |
| 12986 | KCNS3      | 2.51225 | 3.59E-05    |
| 6270  | F3         | 2.50649 | 4.09E-09    |
| 32177 | THBS4      | 2.48547 | 9.17E-05    |
| 6457  | FAM181B    | 2.48092 | 0.0001071   |
| 12644 | INPPL1     | 2.47363 | 7.08E-06    |
| 28624 | PVRL3      | 2.47112 | 3.32E-05    |
| 2885  | C6ORF173   | 2.45642 | 9.25E-05    |
| 25218 | MNX1       | 2.44999 | 9.15E-08    |

|       |              |          |             |
|-------|--------------|----------|-------------|
| 3835  | CEBPD        | 2.44764  | 0.000160544 |
| 6197  | ETS2         | 2.43482  | 2.74E-06    |
| 8206  | GPR98        | 2.37781  | 0.000437636 |
| 30664 | SLC7A2       | 2.36837  | 5.80E-11    |
| 7853  | GINS2        | 2.3541   | 7.75E-05    |
| 29887 | SDC2         | 2.34674  | 3.00E-05    |
| 27402 | PDZRN4       | 2.29374  | 2.31E-06    |
| 16112 | LOC100192378 | 2.2867   | 4.57E-06    |
| 21088 | LOC650494    | 2.27924  | 4.94E-06    |
| 8583  | HERC5        | 2.27663  | 2.89E-07    |
| 1775  | BTG2         | 2.27014  | 6.72E-06    |
| 30719 | SLK          | 2.24997  | 3.57E-05    |
| 19806 | LOC646345    | 2.232    | 3.69E-05    |
| 25137 | MKL2         | 2.22229  | 0.00012672  |
| 7610  | GABRR1       | 2.21011  | 2.33E-07    |
| 8573  | HEPACAM2     | 2.17226  | 1.17E-09    |
| 29151 | RHBDL3       | 2.16408  | 5.80E-05    |
| 27016 | P2RY5        | 2.16065  | 5.91E-06    |
| 30261 | SIAH3        | 2.14795  | 3.46E-05    |
| 30517 | SLC2A8       | 2.13975  | 8.81E-05    |
| 7457  | FREM1        | 2.12587  | 7.87E-08    |
| 1102  | ARL4A        | 2.11255  | 0.000248586 |
| 29277 | RNF128       | 2.07512  | 8.41E-06    |
| 29124 | RGS16        | 2.06237  | 7.60E-05    |
| 8211  | GPRC5C       | 2.04839  | 5.12E-05    |
| 26002 | NGF          | 2.01869  | 9.29E-08    |
| 33375 | UCP2         | 2.00568  | 0.000336807 |
| 11039 | HS.553187    | -2.00024 | 0.000182185 |
| 7972  | GNAI1        | -2.00345 | 0.000400577 |
| 1241  | ASTN1        | -2.00503 | 0.000267753 |
| 29957 | SEL1L3       | -2.00817 | 9.40E-06    |
| 9721  | HS.348844    | -2.06728 | 9.46E-05    |
| 403   | ADAMTS5      | -2.09516 | 8.41E-07    |
| 5268  | DIRAS2       | -2.10442 | 0.000137286 |
| 1042  | ARHGAP22     | -2.11082 | 9.20E-05    |
| 24440 | MGC27121     | -2.11477 | 1.75E-08    |

|       |           |          |             |
|-------|-----------|----------|-------------|
| 28124 | PPP2R2C   | -2.12982 | 0.000152152 |
| 2812  | C5ORF30   | -2.14976 | 2.66E-06    |
| 8046  | GOLSYN    | -2.15553 | 0.000225269 |
| 7626  | GAGE12C   | -2.16085 | 1.15E-07    |
| 728   | AMPH      | -2.19127 | 7.33E-05    |
| 28104 | PPP1R1C   | -2.2262  | 3.10E-07    |
| 28251 | PRKACB    | -2.27738 | 6.28E-05    |
| 26252 | NR5A1     | -2.3262  | 1.83E-08    |
| 153   | ABAT      | -2.33538 | 2.64E-05    |
| 28721 | RAB3B     | -2.33887 | 0.000174687 |
| 31151 | SNX10     | -2.35266 | 0.000210353 |
| 26936 | OSBPL8    | -2.36481 | 0.000356878 |
| 30232 | SHC4      | -2.36756 | 5.88E-06    |
| 28689 | RAB15     | -2.37701 | 4.57E-05    |
| 31222 | SOX2OT    | -2.37929 | 5.44E-06    |
| 10203 | HS.525171 | -2.37949 | 0.000112764 |
| 27287 | PCSK1N    | -2.39396 | 0.000122619 |
| 30200 | SH3BGRL2  | -2.39696 | 0.000352607 |
| 23918 | LY6H      | -2.3986  | 0.000426406 |
| 31543 | STAMBPL1  | -2.40424 | 0.000210764 |
| 12256 | HSPA12A   | -2.4161  | 5.00E-06    |
| 12209 | HS3ST5    | -2.42056 | 1.64E-08    |
| 1764  | BTBD3     | -2.43171 | 9.02E-05    |
| 32742 | TOX2      | -2.47449 | 6.41E-06    |
| 896   | AP1S2     | -2.4814  | 0.000411095 |
| 13764 | LHFPL4    | -2.49494 | 0.000177306 |
| 12801 | ITM2C     | -2.50635 | 0.000289334 |
| 1641  | BLCAP     | -2.52288 | 0.000363648 |
| 30231 | SHC3      | -2.53075 | 2.70E-06    |
| 33964 | XPR1      | -2.55331 | 2.67E-05    |
| 28266 | PRKCE     | -2.55567 | 1.75E-07    |
| 26521 | OPTN      | -2.57271 | 0.000282119 |
| 5325  | DKK3      | -2.57389 | 8.27E-05    |
| 33325 | UBL3      | -2.58024 | 0.000136606 |
| 6859  | FGF13     | -2.58447 | 3.31E-05    |
| 32210 | THY1      | -2.60259 | 0.000107047 |



|       |           |          |             |
|-------|-----------|----------|-------------|
| 30015 | SEPT6     | -2.63038 | 0.000101624 |
| 30351 | SLC12A5   | -2.64265 | 0.000195945 |
| 607   | AKR1C4    | -2.66634 | 0.000217452 |
| 7635  | GAGE2B    | -2.67196 | 4.87E-10    |
| 13177 | KIAA1598  | -2.67619 | 4.25E-05    |
| 1986  | C12ORF68  | -2.67913 | 0.000114615 |
| 25516 | MTSS1     | -2.69402 | 0.000290278 |
| 32535 | TMEM55A   | -2.70095 | 5.71E-06    |
| 25864 | NDST3     | -2.72344 | 9.29E-06    |
| 33591 | VAT1      | -2.74928 | 0.000228555 |
| 26498 | ONECUT1   | -2.77372 | 1.86E-05    |
| 12634 | INPP1     | -2.79095 | 5.83E-05    |
| 5703  | ECEL1     | -2.83259 | 0.000107266 |
| 16740 | LOC387856 | -2.84534 | 0.000116969 |
| 5631  | DUSP6     | -2.85825 | 8.35E-05    |
| 31568 | STC1      | -2.8677  | 0.000365825 |
| 227   | ABLIM2    | -2.8948  | 2.50E-06    |
| 27415 | PELI2     | -2.9135  | 2.07E-05    |
| 2538  | C20ORF46  | -2.92994 | 6.05E-05    |
| 4639  | CSRNP3    | -2.9364  | 6.80E-06    |
| 31628 | STS-1     | -2.94215 | 9.63E-07    |
| 30210 | SH3GL3    | -2.94559 | 0.000343973 |
| 10017 | HS.452398 | -3.01786 | 1.26E-05    |
| 4705  | CTNND2    | -3.02031 | 4.91E-05    |
| 24516 | MGST1     | -3.02712 | 1.36E-06    |
| 4283  | CNR1      | -3.13389 | 0.000271812 |
| 13313 | KLF6      | -3.16185 | 3.73E-05    |
| 7613  | GAD1      | -3.18763 | 0.000116615 |
| 29400 | RORB      | -3.1967  | 5.32E-08    |
| 27566 | PHYHIPL   | -3.21046 | 3.97E-05    |
| 25628 | MYO16     | -3.21287 | 9.14E-06    |
| 25284 | MPPED2    | -3.23371 | 0.000114488 |
| 30531 | SLC32A1   | -3.23601 | 0.000270573 |
| 29034 | RELN      | -3.32027 | 1.95E-05    |
| 26058 | NKX2-1    | -3.35392 | 4.84E-06    |
| 30114 | SFRP1     | -3.38198 | 0.00010787  |

|       |           |          |             |
|-------|-----------|----------|-------------|
| 4965  | DBC1      | -3.3928  | 1.25E-05    |
| 31763 | SYT1      | -3.47973 | 0.00017165  |
| 29624 | RTN1      | -3.48718 | 0.000208889 |
| 3121  | CA10      | -3.49466 | 0.000217475 |
| 24095 | MAP4      | -3.54296 | 0.000118613 |
| 9476  | HS.223856 | -3.61087 | 5.18E-05    |
| 32343 | TMEFF2    | -3.6559  | 1.52E-06    |
| 713   | AMHR2     | -3.65957 | 2.10E-08    |
| 28417 | PSD2      | -3.70127 | 0.000123589 |
| 7106  | FLJ33590  | -3.74166 | 4.19E-06    |
| 4386  | COPG2IT1  | -3.9994  | 7.98E-05    |
| 3207  | CALY      | -4.03219 | 3.21E-06    |
| 30824 | SNCG      | -4.48956 | 2.76E-06    |
| 5455  | DNER      | -4.58982 | 1.95E-05    |
| 5550  | DRD1IP    | -4.64486 | 5.89E-07    |
| 26253 | NR5A2     | -4.70942 | 1.65E-11    |
| 12954 | KCNK12    | -4.77483 | 2.25E-06    |
| 5352  | DLX1      | -4.89802 | 0.000316228 |
| 26332 | NTS       | -4.92922 | 0.000411631 |
| 33565 | UTS2      | -5.26698 | 2.91E-07    |
| 3220  | CAMKV     | -5.35563 | 1.08E-05    |
| 2631  | C22ORF42  | -5.4488  | 2.15E-07    |
| 29220 | RIT2      | -5.49937 | 9.53E-12    |
| 31359 | SPOCK2    | -5.66406 | 5.68E-06    |
| 12746 | ISLR2     | -5.6746  | 0.000247482 |
| 32591 | TMOD1     | -5.689   | 7.66E-12    |
| 3215  | CAMK2N1   | -5.84508 | 2.30E-06    |
| 33592 | VAT1L     | -6.26024 | 7.74E-07    |
| 27971 | POMC      | -6.74106 | 6.72E-05    |
| 26219 | NPTX2     | -7.85511 | 1.15E-05    |
| 25939 | NELL1     | -8.58778 | 1.80E-08    |
| 33624 | VGf       | -8.61516 | 1.37E-05    |
| 31223 | SOX3      | -10.3701 | 8.71E-09    |
| 30314 | SIX6      | -12.5834 | 1.04E-12    |
| 26965 | OTP       | -14.2469 | 6.08E-10    |
| 12743 | ISL1      | -21.0507 | 6.48E-05    |

31479 SST

-21.3179

0.000281588

**Supplementary Table 5:** Gene expression array data of significantly up-regulated and down-regulated genes at differentiation day 25 in SHH/FGF8/Chir treated Floor-plate based population over SHH/FGF8 only treated population.

**Supplementary Table 6**

| <b>Antibody</b>                    | <b>Dilution</b> | <b>Source</b>          | <b>Location</b>               |
|------------------------------------|-----------------|------------------------|-------------------------------|
| Human nuclear antigen              | 1:100           | Millipore              | Billerica, MA                 |
| Human cell adhesion molecule       | 1:100           | Santa Cruz             | Santa Cruz, CA                |
| Tyrosine Hydroxylase (TH)          | 1:1000 / 1:500  | Pel-Freez / ImmunoStar | Rogers, AR / Hudson, WI       |
| $\beta$ -tubulin III               | 1:500 / 1:2000  | Covance                | Littleton, CO / Princeton, NJ |
| Doublecortin                       | 1:100           | Millipore              | Billerica, MA                 |
| Human specific Nestin              | 1:300           | R&D                    | Minneapolis, MN               |
| Nestin # 130                       | 1:50            | Gift: R. McKay         | NINDS, NIH                    |
| FoxA2                              | 1:100           | Santa Cruz             | Santa Cruz, CA                |
| Pitx3                              | 1:100           | Millipore              | Billerica, MA                 |
| $\beta$ -catenin                   | 1:100           | BD                     | Franklin Lakes, NJ            |
| Collagen                           | 1:100           | Oncogene               | LaJolla, CA                   |
| Cytokeratin                        | 1:100           | DAKO                   | Glostrup, DK                  |
| Oct-4                              | 1:200           | Santa Cruz             | Billerica, MA                 |
| Ki-67                              | 1:200 / 1:400   | Zymed / DAKO           | San Francisco, CA             |
| GABA polyclonal                    | 1:2000          | Sigma                  | St Louis, MI                  |
| Serotonin (5-HT)                   | 1:2000          | Sigma                  | St Louis, MI                  |
| GFAP polyclonal                    | 1:2000          | DAKO                   | Glostrup, DK                  |
| Calbindin                          | 1:300           | Abcam                  | Cambridge, MA                 |
| VMAT2                              | 1:200           | Millipore              | Billerica, MA                 |
| DAT                                | 1:1000 / 1:2000 | Millipore              | Billerica, MA /               |
| GFP                                | 1:1000          | Molecular Probes       | Carlsbad, CA                  |
| Girk2                              | 1:200           | Abcam / Alomone        | Cambridge, MA / Israel        |
| FoxG1                              | 1:100           | NeuraCell              | Rensselaer, NY                |
| Pax6                               | 1:100           | Covance                | Princeton, NJ                 |
| Otx2                               | 1:2000          | Strategic Diagnostics  | Newark DE                     |
| Lmx1a                              | 1:2000          | Millipore              | Pittsburgh, PA                |
| Synapsin                           | 1:1000          | Sigma                  | St Louis, MI                  |
| Iba-1                              | 1:200           | Millipore              | Billerica, MA                 |
| ED-1                               | 1:200           | Millipore              | Pittsburgh, PA                |
| Human NCAM (Eric-1)                | 1:100           | Santa Cruz             | Santa Cruz, CA                |
| Human specific cytoplasmn (SC-121) | 1:1000          | Stem Cells Inc.        | Newark, CA                    |
| Nurr-1                             | 1:1500          | Perseus Proteomics     | Japan                         |
