# Supplementary material
Source: PubMed Central journal article supplement (PMC3245796)
Supplement: NIHMS333128-supplement-5.pdf [file NIHMS333128-supplement-5.pdf]

# Declaration of competing financial interests

JOURNAL: NATURE

MANUSCRIPT NUMBER: 2011-08-10820

MANUSCRIPT TITLE: Floor plate-derived dopamine neurons from hESCs efficiently engraft in animal models of PD

Please check one of the following:

1. I declare that the authors have no competing interests as defined by Nature Publishing Group, or other interests that might be perceived to influence the results and discussion reported in this paper.
2. The authors have competing interests as defined by Nature Publishing Group, or other interests that might be perceived to influence the results and discussion reported in this paper.

If you have checked 2, please specify the competing interests:

SIGNATURE:  Digitally signed by Lorenz Studer  
DN: cn=Lorenz Studer, o=Sloan-Kettering Institute, ou=Member, Dev. Biol., email=studerl@mskcc.org, c=US  
Date: 2011.10.18 02:47:43 -04'00'

NAME IN BLOCK CAPITALS: LORENZ STUDER

DATE: \_\_\_\_\_

The Nature journals' competing financial interests policy is defined, and further details of our procedures are explained, at:

[http://www.nature.com/authors/editorial\\_policies/competing.html](http://www.nature.com/authors/editorial_policies/competing.html)
